# Supplementary material for: HSD3B7 as a prognostic-related biomarker predicts poor prognostic in ccRCC
Source: Research Square preprint supplement (doi:10.21203/rs.3.rs-2138170/v1), 2022-10-17
Supplement: Supplementary file 1 [file 639680389029fb5c0898d5e4.docx]

| Compound | RNAtype | RNAmolecule | Omics | Source | T.stat | T.fdr | Chi.stat | Chi.fdr | Pearson.stat | Pearson.fdr | Spearman.stat | Spearman.fdr | Details |
| --- | --- | --- | --- | --- | --- | --- | --- | --- | --- | --- | --- | --- | --- |
| (5Z)-7-Oxozeaenol | mRNA | HSD3B7 | Expression | GDSC | - | - | - | - | 0.1075583 | 0.0042365 | 0.1287569 | 0.0005777 |  |
| 5-Fluorouracil | mRNA | HSD3B7 | Expression | GDSC | - | - | - | - | 0.1190628 | 0.0006602 | 0.1093842 | 0.0016841 |  |
| 8-hydroxy-3-phenylisocoumarin | mRNA | HSD3B7 | Expression | CellMiner | - | - | - | - | - | - | 0.3985844 | 0.0477959 |  |
| AEW541 | mRNA | HSD3B7 | Expression | CCLE | - | - | - | - | - | - | 0.202544 | 0.0219631 |  |
| Axitinib | mRNA | HSD3B7 | Expression | GDSC | - | - | - | - | - | - | 0.1023368 | 0.0060029 |  |
| Bicalutamide | mRNA | HSD3B7 | Expression | GDSC | - | - | - | - | 0.1018607 | 0.0069267 | 0.122668 | 0.0007644 |  |
| BIX02189 | mRNA | HSD3B7 | Expression | GDSC | - | - | - | - | 0.113625 | 0.0010504 | 0.1049436 | 0.0025989 |  |
| Bleomycin (50 uM) | mRNA | HSD3B7 | Expression | GDSC | - | - | - | - | 0.094532 | 0.0090187 | 0.1199822 | 0.0006981 |  |
| BX795 | mRNA | HSD3B7 | Expression | GDSC | - | - | - | - | 0.1049044 | 0.005839 | 0.125964 | 0.000802 |  |
| Docetaxel | mRNA | HSD3B7 | Expression | GDSC | - | - | - | - | 0.1039012 | 0.003795 | 0.0880428 | 0.0139099 |  |
| Elesclomol | mRNA | HSD3B7 | Expression | GDSC | - | - | - | - | - | - | 0.0860217 | 0.0358068 |  |
| Fedratinib | mRNA | HSD3B7 | Expression | GDSC | - | - | - | - | 0.1028436 | 0.0035078 | 0.0837516 | 0.018566 |  |
| FR-180204 | mRNA | HSD3B7 | Expression | GDSC | - | - | - | - | 0.1108193 | 0.001969 | 0.091756 | 0.0109143 |  |
| GSK269962A | mRNA | HSD3B7 | Expression | GDSC | - | - | - | - | - | - | 0.0899629 | 0.020837 |  |
| GSK429286A | mRNA | HSD3B7 | Expression | GDSC | - | - | - | - | 0.1095688 | 0.0016883 | 0.1242299 | 0.0003122 |  |
| GSK690693 | mRNA | HSD3B7 | Expression | GDSC | - | - | - | - | 0.102647 | 0.003437 | 0.0726996 | 0.041849 |  |
| GW-2580 | mRNA | HSD3B7 | Expression | GDSC | - | - | - | - | 0.0988038 | 0.0066815 | 0.1053506 | 0.0030459 |  |
| IOX2 | mRNA | HSD3B7 | Expression | GDSC | - | - | - | - | - | - | 0.1080518 | 0.0048033 |  |
| Irinotecan | mRNA | HSD3B7 | Expression | CCLE | - | - | - | - | - | - | 0.3005746 | 4.13E-06 |  |
| JQ1 | mRNA | HSD3B7 | Expression | GDSC | - | - | - | - | 0.1066119 | 0.0034852 | 0.0876062 | 0.0185614 |  |
| JW-7-24-1 | mRNA | HSD3B7 | Expression | GDSC | - | - | - | - | 0.1011472 | 0.0042377 | 0.0957424 | 0.0065684 |  |
| KIN001-244 | mRNA | HSD3B7 | Expression | GDSC | - | - | - | - | 0.1096659 | 0.0018029 | 0.0963308 | 0.0059838 |  |
| KIN001-266 | mRNA | HSD3B7 | Expression | GDSC | - | - | - | - | 0.1258066 | 0.0006004 | 0.1081004 | 0.0027868 |  |
| KIN001-270 | mRNA | HSD3B7 | Expression | GDSC | - | - | - | - | 0.116392 | 0.0007698 | 0.1248661 | 0.0002853 |  |
| L-685458 | mRNA | HSD3B7 | Expression | CCLE | - | - | - | - | 0.2183864 | 0.0012697 | 0.3605968 | 1.22E-08 |  |
| Lenalidomide | mRNA | HSD3B7 | Expression | GDSC | - | - | - | - | 0.0928099 | 0.0097631 | 0.1118311 | 0.0016577 |  |
| Linifanib | mRNA | HSD3B7 | Expression | GDSC | - | - | - | - | - | - | 0.1128767 | 0.0017431 |  |
| Masitinib | mRNA | HSD3B7 | Expression | GDSC | - | - | - | - | 0.0996361 | 0.0047498 | 0.1130257 | 0.0011303 |  |
| Methotrexate | mRNA | HSD3B7 | Expression | GDSC | - | - | - | - | 0.0924348 | 0.0078602 | 0.1229394 | 0.0003599 |  |
| NG-25 | mRNA | HSD3B7 | Expression | GDSC | - | - | - | - | 0.1086264 | 0.0018407 | 0.0948057 | 0.0068612 |  |
| Nilotinib | mRNA | HSD3B7 | Expression | CCLE | - | - | - | - | - | - | 0.1832591 | 0.0250765 |  |
| Nutlin-3 | mRNA | HSD3B7 | Expression | CCLE | - | - | - | - | - | - | 0.2092919 | 0.0120237 |  |
| OSI-027 | mRNA | HSD3B7 | Expression | GDSC | - | - | - | - | 0.0993635 | 0.0051888 | 0.0832292 | 0.0186757 |  |
| Paclitaxel | mRNA | HSD3B7 | Expression | CCLE | - | - | - | - | - | - | 0.1917955 | 0.0097088 |  |
| Panobinostat | mRNA | HSD3B7 | Expression | CCLE | - | - | - | - | - | - | 0.2737963 | 1.59E-05 |  |
| PD-0332991 | mRNA | HSD3B7 | Expression | CCLE | - | - | - | - | 0.1894295 | 0.007086 | 0.3335224 | 2.50E-07 |  |
| PD173074 | mRNA | HSD3B7 | Expression | GDSC | - | - | - | - | - | - | 0.0788963 | 0.0376858 |  |
| PF2341066 | mRNA | HSD3B7 | Expression | CCLE | - | - | - | - | - | - | 0.2429834 | 0.0003197 |  |
| PFI-1 | mRNA | HSD3B7 | Expression | GDSC | - | - | - | - | 0.1150036 | 0.0032003 | 0.1178952 | 0.0024648 |  |
| PHA-665752 | mRNA | HSD3B7 | Expression | CCLE | - | - | - | - | - | - | 0.2302013 | 0.0021815 |  |
| Phenformin | mRNA | HSD3B7 | Expression | GDSC | - | - | - | - | 0.0950101 | 0.0089647 | - | - |  |
| Piperlongumine | mRNA | HSD3B7 | Expression | GDSC | - | - | - | - | - | - | 0.1096155 | 0.0062761 |  |
| PLX-4720 | mRNA | HSD3B7 | Expression | GDSC | - | - | - | - | 0.1138905 | 0.0027656 | 0.1292151 | 0.0005314 |  |
| PLX4720 | mRNA | HSD3B7 | Expression | CCLE | - | - | - | - | - | - | 0.1596017 | 0.0460282 |  |
| QL-X-138 | mRNA | HSD3B7 | Expression | GDSC | - | - | - | - | 0.1205478 | 0.0006481 | 0.0844667 | 0.018818 |  |
| QL-XI-92 | mRNA | HSD3B7 | Expression | GDSC | - | - | - | - | 0.093219 | 0.0075394 | 0.0939501 | 0.006987 |  |
| RO-3306 | mRNA | HSD3B7 | Expression | GDSC | - | - | - | - | - | - | 0.0981679 | 0.0432547 |  |
| Ruxolitinib | mRNA | HSD3B7 | Expression | GDSC | - | - | - | - | - | - | 0.1158978 | 0.000805 |  |
| SB505124 | mRNA | HSD3B7 | Expression | GDSC | - | - | - | - | 0.1176368 | 0.0014713 | 0.1402917 | 9.40E-05 |  |
| SGC0946 | mRNA | HSD3B7 | Expression | GDSC | - | - | - | - | - | - | 0.0848196 | 0.017273 |  |
| SL0101 | mRNA | HSD3B7 | Expression | GDSC | - | - | - | - | 0.1049242 | 0.0049613 | 0.1236399 | 0.0008102 |  |
| SN-38 | mRNA | HSD3B7 | Expression | GDSC | - | - | - | - | 0.1219196 | 0.0012093 | 0.1546049 | 3.08E-05 |  |
| Sorafenib | mRNA | HSD3B7 | Expression | CCLE | - | - | - | - | - | - | 0.2526177 | 0.0003567 |  |
| STF-62247 | mRNA | HSD3B7 | Expression | GDSC | - | - | - | - | - | - | 0.0701319 | 0.045346 |  |
| TAE684 | mRNA | HSD3B7 | Expression | CCLE | - | - | - | - | - | - | 0.1766003 | 0.0192547 |  |
| Talazoparib | mRNA | HSD3B7 | Expression | GDSC | - | - | - | - | 0.119167 | 0.0027833 | 0.1252227 | 0.0017527 |  |
| Tanespimycin | mRNA | HSD3B7 | Expression | GDSC | - | - | - | - | -0.102489 | 0.0035725 | -0.105405 | 0.0024586 |  |
| Temozolomide | mRNA | HSD3B7 | Expression | GDSC | - | - | - | - | 0.0995302 | 0.005483 | 0.167535 | 1.27E-06 |  |
| Tivozanib | mRNA | HSD3B7 | Expression | GDSC | - | - | - | - | 0.1119331 | 0.0013851 | 0.1738587 | 3.21E-07 |  |
| TKI258 | mRNA | HSD3B7 | Expression | CCLE | - | - | - | - | - | - | 0.2506153 | 0.0001963 |  |
| TL-1-85 | mRNA | HSD3B7 | Expression | GDSC | - | - | - | - | 0.1137674 | 0.0010359 | 0.1222785 | 0.0004032 |  |
| TL-2-105 | mRNA | HSD3B7 | Expression | GDSC | - | - | - | - | 0.1140063 | 0.0009347 | 0.0969141 | 0.0049217 |  |
| TW 37 | mRNA | HSD3B7 | Expression | GDSC | - | - | - | - | - | - | 0.0903095 | 0.0281063 |  |
| UNC1215 | mRNA | HSD3B7 | Expression | GDSC | - | - | - | - | 0.1152313 | 0.0009405 | 0.1421937 | 3.55E-05 |  |
| Vinblastine | mRNA | HSD3B7 | Expression | GDSC | - | - | - | - | 0.1121499 | 0.003762 | 0.1192431 | 0.0020434 |  |
| Vismodegib | mRNA | HSD3B7 | Expression | GDSC | - | - | - | - | - | - | 0.082323 | 0.0251735 |  |
| VNLG/124 | mRNA | HSD3B7 | Expression | GDSC | - | - | - | - | 0.1078052 | 0.0019188 | 0.1203501 | 0.0004773 |  |
| VX-11e | mRNA | HSD3B7 | Expression | GDSC | - | - | - | - | 0.0981124 | 0.0094233 | 0.0771163 | 0.0397066 |  |
| VX-702 | mRNA | HSD3B7 | Expression | GDSC | - | - | - | - | - | - | 0.1028475 | 0.0035477 |  |
| WHI-P97 | mRNA | HSD3B7 | Expression | GDSC | - | - | - | - | - | - | 0.077607 | 0.0465995 |  |
| XMD14-99 | mRNA | HSD3B7 | Expression | GDSC | - | - | - | - | 0.0937995 | 0.0068408 | 0.1181759 | 0.0005759 |  |
| Y-39983 | mRNA | HSD3B7 | Expression | GDSC | - | - | - | - | 0.0985655 | 0.0050205 | 0.1063066 | 0.0023325 |  |
| Zibotentan | mRNA | HSD3B7 | Expression | GDSC | - | - | - | - | 0.0963027 | 0.0059628 | 0.1482854 | 1.49E-05 |  |
|  |  |  |  |  |  |  |  |  |  |  |  |  |  |

Drug response data related with the expression of HSD3B7
