# Supplementary material for: HSD3B7 as a prognostic-related biomarker predicts poor prognostic in ccRCC
Source: Research Square preprint supplement (doi:10.21203/rs.3.rs-2138170/v1), 2022-10-17
Supplement: Supplementary file 2 [file 96df6d49defd800216e0c90e.docx]

The expression of HSD3B7 in 30 different cancer cell line types

| Depmap ID | Expression 22Q1 Public | Cell Line Name | Primary Disease | Lineage | Lineage Subtype | |  |
| --- | --- | --- | --- | --- | --- | --- | --- |
| ACH-000001 | 2.2809563 | NIHOVCAR3 | Ovarian Cancer | Ovary | Ovary Adenocarcinoma | |  |
| ACH-000002 | 0.4436067 | HL60 | Leukemia | Blood | AML |  | |
| ACH-000003 | 1.4541759 | CACO2 | Colon/Colorectal Cancer | Colorectal | Colorectal Adenocarcinoma | | |
| ACH-000004 | 1.7004397 | HEL | Leukemia | Blood | AML |  | |
| ACH-000005 | 1.2986583 | HEL9217 | Leukemia | Blood | AML |  | |
| ACH-000006 | 1.2986583 | MONOMAC6 | Leukemia | Blood | AML |  | |
| ACH-000007 | 3.3533233 | LS513 | Colon/Colorectal Cancer | Colorectal | Colorectal Adenocarcinoma | | |
| ACH-000008 | 1.2509616 | A101D | Skin Cancer | Skin | Melanoma |  | |
| ACH-000009 | 1.3895668 | C2BBE1 | Colon/Colorectal Cancer | Colorectal | Colorectal Adenocarcinoma | | |
| ACH-000011 | 5.9349882 | 253J | Bladder Cancer | Urinary Tract | Bladder Carcinoma | |  |
| ACH-000012 | 4.0054 | HCC827 | Lung Cancer | Lung | NSCLC |  | |
| ACH-000013 | 1.9107327 | ONCODG1 | Ovarian Cancer | Ovary | Ovary Adenocarcinoma | |  |
| ACH-000014 | 2.7268312 | HS294T | Skin Cancer | Skin | Melanoma |  | |
| ACH-000015 | 1.1440464 | NCIH1581 | Lung Cancer | Lung | NSCLC |  | |
| ACH-000016 | 5.0329824 | SLR21 | Kidney Cancer | Kidney | Renal Cell Carcinoma | |  |
| ACH-000017 | 3.5172757 | SKBR3 | Breast Cancer | Breast | Breast Carcinoma | |  |
| ACH-000018 | 2.784504 | T24 | Bladder Cancer | Urinary Tract | Bladder Carcinoma | |  |
| ACH-000019 | 4.4302853 | MCF7 | Breast Cancer | Breast | Breast Carcinoma | |  |
| ACH-000020 | 1.7136958 | MHHCALL2 | Leukemia | Blood | ALL |  | |
| ACH-000021 | 4.4242503 | NCIH1693 | Lung Cancer | Lung | NSCLC |  | |
| ACH-000022 | 1.4594316 | PATU8988S | Pancreatic Cancer | Pancreas | Exocrine |  | |
| ACH-000023 | 0.8639385 | PATU8988T | Pancreatic Cancer | Pancreas | Exocrine |  | |
| ACH-000024 | 0.4436067 | OPM2 | Myeloma | Plasma Cell | Multiple Myeloma | |  |
| ACH-000025 | 1.117695 | CH157MN | Brain Cancer | Central Nervous System | Meningioma |  | |
| ACH-000026 | 5.9569859 | 253JBV | Bladder Cancer | Urinary Tract | Bladder Carcinoma | |  |
| ACH-000027 | 1.7782086 | GOS3 | Brain Cancer | Central Nervous System | Glioma |  | |
| ACH-000028 | 4.3847406 | KPL1 | Breast Cancer | Breast | Breast Carcinoma | |  |
| ACH-000029 | 3.7750505 | HCC827GR5 | Lung Cancer | Lung | NSCLC |  | |
| ACH-000030 | 4.31252 | PC14 | Lung Cancer | Lung | NSCLC |  | |
| ACH-000031 | 4.1415963 | PANC0213 | Pancreatic Cancer | Pancreas | Exocrine |  | |
| ACH-000032 | 0.4646683 | MHHCALL3 | Leukemia | Blood | ALL |  | |
| ACH-000033 | 1.3504972 | NCIH1819 | Lung Cancer | Lung | NSCLC |  | |
| ACH-000034 | 2.1342209 | PLB985 | Leukemia | Blood | AML |  | |
| ACH-000035 | 2.3701643 | NCIH1650 | Lung Cancer | Lung | NSCLC |  | |
| ACH-000036 | 2.4141355 | U343 | Brain Cancer | Central Nervous System | Glioma |  | |
| ACH-000037 | 4.6559242 | S117 | Sarcoma | Soft Tissue | Thyroid Sarcoma | |  |
| ACH-000038 | 0.6322682 | EHEB | Lymphoma | Lymphocyte | Lymphoma Unspecified | |  |
| ACH-000039 | 0.7655347 | SKNMC | Bone Cancer | Bone | Ewing Sarcoma | |  |
| ACH-000040 | 4.9717734 | U118MG | Brain Cancer | Central Nervous System | Glioma |  | |
| ACH-000041 | 1.0703893 | RDES | Bone Cancer | Bone | Ewing Sarcoma | |  |
| ACH-000042 | 3.0617762 | PANC0203 | Pancreatic Cancer | Pancreas | Exocrine |  | |
| ACH-000043 | 3.797013 | HS895T | Fibroblast | Fibroblast | Fibroblast Skin | |  |
| ACH-000044 | 3.2172307 | MDAMB134VI | Breast Cancer | Breast | Breast Ductal Carcinoma | | |
| ACH-000045 | 2.9855004 | MV411 | Leukemia | Blood | AML |  | |
| ACH-000046 | 5.9483672 | ACHN | Kidney Cancer | Kidney | Renal Cell Carcinoma | |  |
| ACH-000048 | 1.1309309 | TOV112D | Ovarian Cancer | Ovary | Ovary Adenocarcinoma | |  |
| ACH-000049 | 1.9927684 | HEKTE | Engineered | Engineered Kidney | |  | |
| ACH-000050 | 0.3673711 | NCIH929 | Myeloma | Plasma Cell | Multiple Myeloma | |  |
| ACH-000051 | 1.9448584 | TE617T | Sarcoma | Soft Tissue | Rhabdomyosarcoma | |  |
| ACH-000052 | 1.1570437 | A673 | Bone Cancer | Bone | Ewing Sarcoma | |  |
| ACH-000053 | 5.4551628 | KARPAS299 | Lymphoma | Lymphocyte | Non Hodgkin Lymphoma | |  |
| ACH-000054 | 2.1890338 | HT1080 | Sarcoma | Soft Tissue | Fibrosarcoma | |  |
| ACH-000055 | 1.6553518 | D283MED | Brain Cancer | Central Nervous System | Medulloblastoma | |  |
| ACH-000056 | 0.5260688 | DOHH2 | Lymphoma | Lymphocyte | Non Hodgkin Lymphoma | |  |
| ACH-000057 | 0.2141248 | OPM1 | Myeloma | Plasma Cell | Multiple Myeloma | |  |
| ACH-000058 | 2.5459684 | ML1 | Thyroid Cancer | Thyroid | Thyroid Carcinoma | |  |
| ACH-000059 | 0.5849625 | SUPB15 | Leukemia | Blood | ALL |  | |
| ACH-000060 | 5.5734957 | PANC1005 | Pancreatic Cancer | Pancreas | Exocrine |  | |
| ACH-000061 | 0.4646683 | HH | Lymphoma | Lymphocyte | Non Hodgkin Lymphoma | |  |
| ACH-000062 | 2.65764 | RERFLCMS | Lung Cancer | Lung | NSCLC |  | |
| ACH-000063 | 4.5527459 | HS616T | Fibroblast | Fibroblast | Fibroblast Lymphocyte | | |
| ACH-000064 | 1.9183862 | SALE | Engineered | Engineered Lung | |  | |
| ACH-000065 | 0.6870607 | OCIAML5 | Leukemia | Blood | AML |  | |
| ACH-000066 | 5.4158263 | HCC4006 | Lung Cancer | Lung | NSCLC |  | |
| ACH-000067 | 1.9708537 | HS683 | Brain Cancer | Central Nervous System | Glioma |  | |
| ACH-000068 | 0.3673711 | REC1 | Lymphoma | Lymphocyte | Non Hodgkin Lymphoma | |  |
| ACH-000069 | 0.9030383 | HS611T | Lymphoma | Lymphocyte | Hodgkin Lymphoma | |  |
| ACH-000070 | 0.3785116 | 697 | Leukemia | Blood | ALL |  | |
| ACH-000071 | 2.8359241 | HS706T | Fibroblast | Fibroblast | Fibroblast Bone | |  |
| ACH-000072 | 1.6780719 | MEG01 | Leukemia | Blood | CML |  | |
| ACH-000073 | 0.6870607 | GRANTA519 | Lymphoma | Lymphocyte | Non Hodgkin Lymphoma | |  |
| ACH-000074 | 2.0976108 | KU812 | Leukemia | Blood | CML |  | |
| ACH-000075 | 4.7371459 | U87MG | Brain Cancer | Central Nervous System | Glioma |  | |
| ACH-000076 | 1.929791 | NCO2 | Leukemia | Blood | CML |  | |
| ACH-000077 | 2.2986583 | MJ | Lymphoma | Lymphocyte | Non Hodgkin Lymphoma | |  |
| ACH-000078 | 1.0976108 | MHHNB11 | Neuroblastoma | Peripheral Nervous System | Neuroblastoma | |  |
| ACH-000079 | 4.2364926 | TE125T | Fibroblast | Fibroblast | Fibroblast Soft Tissue | | |
| ACH-000080 | 0.5459684 | BDCM | Leukemia | Blood | AML |  | |
| ACH-000081 | 0.6507646 | GDM1 | Leukemia | Blood | AML |  | |
| ACH-000082 | 1.1634987 | G292CLONEA141B1 | Bone Cancer | Bone | Osteosarcoma | |  |
| ACH-000083 | 4.4066727 | HS281T | Fibroblast | Fibroblast | Fibroblast Breast | |  |
| ACH-000084 | 2.3161457 | MUTZ3 | Leukemia | Blood | AML |  | |
| ACH-000085 | 1.9107327 | T3M4 | Pancreatic Cancer | Pancreas | Exocrine |  | |
| ACH-000086 | 2.3015876 | ACCMESO1 | Lung Cancer | Lung | Mesothelioma | |  |
| ACH-000087 | 0.8399596 | SKES1 | Bone Cancer | Bone | Ewing Sarcoma | |  |
| ACH-000088 | 4.2380225 | HS172T | Fibroblast | Fibroblast | Fibroblast Urinary Tract | | |
| ACH-000089 | 4.9202933 | NCIH684 | Colon/Colorectal Cancer | Colorectal | Colorectal Adenocarcinoma | | |
| ACH-000090 | 2.6461627 | PC3 | Prostate Cancer | Prostate | Prostate Adenocarcinoma | | |
| ACH-000091 | 3.7750505 | OV56 | Ovarian Cancer | Ovary | Ovary Adenocarcinoma | |  |
| ACH-000092 | 5.4073528 | NCIH2452 | Lung Cancer | Lung | Mesothelioma | |  |
| ACH-000093 | 3.1618877 | PANC0504 | Pancreatic Cancer | Pancreas | Exocrine |  | |
| ACH-000094 | 3.9791108 | HPAFII | Pancreatic Cancer | Pancreas | Exocrine |  | |
| ACH-000095 | 2.1667154 | D341 | Brain Cancer | Central Nervous System | Medulloblastoma | |  |
| ACH-000096 | 2.7990873 | G401 | Rhabdoid | Kidney | Malignant Rhabdoid Tumor | | |
| ACH-000097 | 4.5582676 | ZR751 | Breast Cancer | Breast | Breast Ductal Carcinoma | | |
| ACH-000098 | 0.7824086 | GAMG | Brain Cancer | Central Nervous System | Glioma |  | |
| ACH-000099 | 0.8559897 | SIMA | Neuroblastoma | Peripheral Nervous System | Neuroblastoma | |  |
| ACH-000100 | 1.7990873 | RH41 | Sarcoma | Soft Tissue | Rhabdomyosarcoma | |  |
| ACH-000101 | 1.1634987 | KE37 | Leukemia | Blood | ALL |  | |
| ACH-000102 | 2.4356286 | GMS10 | Brain Cancer | Central Nervous System | Glioma |  | |
| ACH-000103 | 3.6450099 | CAOV4 | Ovarian Cancer | Ovary | Ovary Adenocarcinoma | |  |
| ACH-000104 | 1.7655347 | LOUCY | Leukemia | Blood | ALL |  | |
| ACH-000105 | 0.8155754 | ALLSIL | Leukemia | Blood | ALL |  | |
| ACH-000106 | 2.5777309 | JVM2 | Lymphoma | Lymphocyte | Non Hodgkin Lymphoma | |  |
| ACH-000107 | 4.444932 | CAPAN2 | Pancreatic Cancer | Pancreas | Exocrine |  | |
| ACH-000108 | 6.2330444 | KP3 | Pancreatic Cancer | Pancreas | Exocrine |  | |
| ACH-000109 | 4.6542064 | NCIH3255 | Lung Cancer | Lung | NSCLC |  | |
| ACH-000110 | 2.7114949 | NCCSTCK140 | Gastric Cancer | Gastric | Gastric Adenocarcinoma | | |
| ACH-000111 | 2.275007 | HCC1187 | Breast Cancer | Breast | Breast Ductal Carcinoma | | |
| ACH-000112 | 0.8479969 | SIGM5 | Leukemia | Blood | AML |  | |
| ACH-000113 | 0.6959938 | OCIAML2 | Leukemia | Blood | AML |  | |
| ACH-000114 | 2.0356239 | SU8686 | Pancreatic Cancer | Pancreas | Exocrine |  | |
| ACH-000115 | 0.5753123 | VCAP | Prostate Cancer | Prostate | Prostate Adenocarcinoma | | |
| ACH-000116 | 3.6299394 | OAW28 | Ovarian Cancer | Ovary | Ovary Adenocarcinoma | |  |
| ACH-000117 | 3.502076 | EFM192A | Breast Cancer | Breast | Breast Adenocarcinoma | | |
| ACH-000118 | 3.3617684 | HUPT3 | Pancreatic Cancer | Pancreas | Exocrine |  | |
| ACH-000119 | 4.5416387 | HS863T | Fibroblast | Fibroblast | Fibroblast Bone | |  |
| ACH-000120 | 1.0703893 | CHP212 | Neuroblastoma | Peripheral Nervous System | Neuroblastoma | |  |
| ACH-000121 | 4.2764967 | NCIH2405 | Lung Cancer | Lung | NSCLC |  | |
| ACH-000122 | 1.1570437 | SUPT11 | Leukemia | Blood | ALL |  | |
| ACH-000123 | 1.7782086 | COV434 | Ovarian Cancer | Ovary | Ovary Adenocarcinoma | |  |
| ACH-000124 | 0.3561438 | OCILY19 | Lymphoma | Lymphocyte | Non Hodgkin Lymphoma | |  |
| ACH-000125 | 4.5459684 | TO175T | Fibroblast | Fibroblast | Fibroblast Lymphocyte | | |
| ACH-000126 | 2.5134907 | KG1C | Brain Cancer | Central Nervous System | Glioma |  | |
| ACH-000127 | 5.0027025 | SLR20 | Kidney Cancer | Kidney | Renal Cell Carcinoma | |  |
| ACH-000128 | 1.1440464 | LN319 | Brain Cancer | Central Nervous System | Glioma |  | |
| ACH-000129 | 0.6507646 | NCIH1341 | Lung Cancer | Lung | SCLC |  | |
| ACH-000130 | 0.9107327 | NALM19 | Leukemia | Blood | ALL |  | |
| ACH-000131 | 3.1489341 | HS229T | Fibroblast | Fibroblast | Fibroblast Lung | |  |
| ACH-000132 | 3.6948802 | JHOS2 | Ovarian Cancer | Ovary | Ovary Adenocarcinoma | |  |
| ACH-000133 | 2.9781956 | HS729 | Fibroblast | Fibroblast | Fibroblast Soft Tissue | | |
| ACH-000134 | 4.2464081 | HS274T | Fibroblast | Fibroblast | Fibroblast Breast | |  |
| ACH-000135 | 4.1415963 | HS940T | Fibroblast | Fibroblast | Fibroblast Skin | |  |
| ACH-000136 | 1.4114262 | CHP126 | Neuroblastoma | Peripheral Nervous System | Neuroblastoma | |  |
| ACH-000137 | 2.448901 | 8MGBA | Brain Cancer | Central Nervous System | Glioma |  | |
| ACH-000138 | 3.4114262 | CFPAC1 | Pancreatic Cancer | Pancreas | Exocrine |  | |
| ACH-000139 | 1.6825733 | PANC0327 | Pancreatic Cancer | Pancreas | Exocrine |  | |
| ACH-000140 | 0.9634741 | PFEIFFER | Lymphoma | Lymphocyte | Non Hodgkin Lymphoma | |  |
| ACH-000141 | 3.547203 | SNU308 | Gallbladder Cancer | Bile Duct | Gallbladder Adenocarcinoma | | |
| ACH-000142 | 2.4005379 | CAL29 | Bladder Cancer | Urinary Tract | Bladder Carcinoma | |  |
| ACH-000143 | 0.4005379 | HCC2429 | Lung Cancer | Lung | NSCLC |  | |
| ACH-000144 | 2.6825733 | RERFGC1B | Gastric Cancer | Gastric | Gastric Adenocarcinoma | | |
| ACH-000145 | 4.7235586 | SKLMS1 | Sarcoma | Soft Tissue | Leiomyosarcoma | |  |
| ACH-000146 | 1.1953476 | THP1 | Leukemia | Blood | AML |  | |
| ACH-000147 | 4.3792051 | T47D | Breast Cancer | Breast | Breast Ductal Carcinoma | | |
| ACH-000148 | 3.6982185 | HS578T | Breast Cancer | Breast | Breast Carcinoma | |  |
| ACH-000149 | 2.9671686 | SKNSH | Neuroblastoma | Peripheral Nervous System | Neuroblastoma | |  |
| ACH-000150 | 5.541329 | HCC2935 | Lung Cancer | Lung | NSCLC |  | |
| ACH-000151 | 0.8399596 | JM1 | Leukemia | Blood | ALL |  | |
| ACH-000152 | 3.5071603 | M059K | Brain Cancer | Central Nervous System | Glioma |  | |
| ACH-000153 | 3.7612853 | NCIH2052 | Lung Cancer | Lung | Mesothelioma | |  |
| ACH-000154 | 4.4834934 | HS888T | Fibroblast | Fibroblast | Fibroblast Bone | |  |
| ACH-000155 | 3.3826673 | SW1990 | Pancreatic Cancer | Pancreas | Exocrine |  | |
| ACH-000156 | 0.7136958 | MHHCALL4 | Leukemia | Blood | ALL |  | |
| ACH-000157 | 3.4568061 | A4FUK | Lymphoma | Lymphocyte | Non Hodgkin Lymphoma | |  |
| ACH-000158 | 0.2630344 | OCILY3 | Lymphoma | Lymphocyte | Non Hodgkin Lymphoma | |  |
| ACH-000159 | 3.8349134 | OSRC2 | Kidney Cancer | Kidney | Renal Cell Carcinoma | |  |
| ACH-000160 | 0.7570232 | BT12 | Rhabdoid | Soft Tissue | ATRT |  | |
| ACH-000161 | 5.5341861 | CORL105 | Lung Cancer | Lung | NSCLC |  | |
| ACH-000162 | 0.3785116 | GA10 | Lymphoma | Lymphocyte | Non Hodgkin Lymphoma | |  |
| ACH-000163 | 2.3015876 | SW579 | Thyroid Cancer | Thyroid | Thyroid Squamous | |  |
| ACH-000164 | 1.9145645 | PANC1 | Pancreatic Cancer | Pancreas | Exocrine |  | |
| ACH-000165 | 4.3778179 | HS751T | Fibroblast | Fibroblast | Fibroblast Lymphocyte | | |
| ACH-000166 | 1.9523336 | KASUMI6 | Leukemia | Blood | AML |  | |
| ACH-000167 | 0.7311832 | KE97 | Myeloma | Plasma Cell | Multiple Myeloma | |  |
| ACH-000168 | 1.2509616 | NOMO1 | Leukemia | Blood | AML |  | |
| ACH-000169 | 3.4502215 | RD | Sarcoma | Soft Tissue | Rhabdomyosarcoma | |  |
| ACH-000170 | 1.9145645 | PRECLH | Engineered | Engineered Prostate | |  | |
| ACH-000171 | 4.5453506 | VMRCRCZ | Kidney Cancer | Kidney | Renal Cell Carcinoma | |  |
| ACH-000172 | 3.6322682 | TM87 | Rhabdoid | Soft Tissue | Malignant Rhabdoid Tumor | | |
| ACH-000173 | 2.4059924 | JHUEM3 | Endometrial/Uterine Cancer | Uterus | Endometrial Adenocarcinoma | | |
| ACH-000174 | 4.2942531 | CAL62 | Thyroid Cancer | Thyroid | Thyroid Carcinoma | |  |
| ACH-000175 | 4.7944159 | TE159T | Fibroblast | Fibroblast | Fibroblast Soft Tissue | | |
| ACH-000176 | 3.6182387 | LOUNH91 | Lung Cancer | Lung | NSCLC |  | |
| ACH-000177 | 3.2218771 | NCIH660 | Prostate Cancer | Prostate | Prostate Small Cell | |  |
| ACH-000178 | 2.5084287 | HS766T | Pancreatic Cancer | Pancreas | Exocrine |  | |
| ACH-000179 | 2.2326608 | NCIH1618 | Lung Cancer | Lung | SCLC |  | |
| ACH-000180 | 4.6380738 | HS839T | Fibroblast | Fibroblast | Fibroblast Skin | |  |
| ACH-000181 | 1.7612853 | SCC9 | Head and Neck Cancer | Upper Aerodigestive | Upper Aerodigestive Squamous | | |
| ACH-000182 | 3.4073528 | SNU869 | Bile Duct Cancer | Bile Duct | Cholangiocarcinoma | |  |
| ACH-000183 | 1.9068906 | L363 | Myeloma | Plasma Cell | Multiple Myeloma | |  |
| ACH-000184 | 5.1683211 | HS343T | Fibroblast | Fibroblast | Fibroblast Breast | |  |
| ACH-000185 | 4.2326608 | HS737T | Fibroblast | Fibroblast | Fibroblast Bone | |  |
| ACH-000186 | 2.1375035 | NCIH2444 | Lung Cancer | Lung | NSCLC |  | |
| ACH-000187 | 1.1826923 | CORL311 | Lung Cancer | Lung | SCLC |  | |
| ACH-000188 | 1.0285692 | SCC25 | Head and Neck Cancer | Upper Aerodigestive | Upper Aerodigestive Squamous | | |
| ACH-000189 | 4.2047668 | RCC10RGB | Kidney Cancer | Kidney | Renal Cell Carcinoma | |  |
| ACH-000190 | 2.3276874 | HDMYZ | Leukemia | Unknown |  | | |
| ACH-000191 | 5.159064 | BHT101 | Thyroid Cancer | Thyroid | Thyroid Carcinoma | |  |
| ACH-000192 | 4.0018022 | MFE280 | Endometrial/Uterine Cancer | Uterus | Endometrial Adenocarcinoma | | |
| ACH-000193 | 0.275007 | KARPAS620 | Myeloma | Plasma Cell | Multiple Myeloma | |  |
| ACH-000194 | 5.1799091 | HS934T | Fibroblast | Fibroblast | Fibroblast Skin | |  |
| ACH-000195 | 5.1309309 | SET2 | Leukemia | Blood | AML |  | |
| ACH-000196 | 1.9183862 | HCC1599 | Breast Cancer | Breast | Breast Ductal Carcinoma | | |
| ACH-000197 | 0.9030383 | TALL1 | Leukemia | Blood | ALL |  | |
| ACH-000198 | 2.4168397 | EOL1 | Leukemia | Blood | AML |  | |
| ACH-000199 | 4.4587757 | HS255T | Fibroblast | Fibroblast | Fibroblast Colorectal | | |
| ACH-000200 | 3.2032012 | NMCG1 | Brain Cancer | Central Nervous System | Glioma |  | |
| ACH-000201 | 2.8855744 | A204 | Rhabdoid | Soft Tissue | Malignant Rhabdoid Tumor | | |
| ACH-000202 | 2.0179219 | COLO320 | Colon/Colorectal Cancer | Colorectal | Colorectal Adenocarcinoma | | |
| ACH-000203 | 2.0179219 | NH6 | Neuroblastoma | Peripheral Nervous System | Neuroblastoma | |  |
| ACH-000204 | 0.4114262 | LP1 | Myeloma | Plasma Cell | Multiple Myeloma | |  |
| ACH-000205 | 3.9345165 | PK59 | Pancreatic Cancer | Pancreas | Exocrine |  | |
| ACH-000206 | 1.4750849 | C8166 | Lymphoma | Lymphocyte | ATL |  | |
| ACH-000207 | 1.448901 | DETROIT562 | Head and Neck Cancer | Upper Aerodigestive | Upper Aerodigestive Squamous | | |
| ACH-000208 | 3.866908 | U178 | Brain Cancer | Central Nervous System | Glioma |  | |
| ACH-000209 | 4.8439838 | SNU1079 | Bile Duct Cancer | Bile Duct | Cholangiocarcinoma | |  |
| ACH-000210 | 2.0143553 | CADOES1 | Bone Cancer | Bone | Ewing Sarcoma | |  |
| ACH-000211 | 1.5945485 | DAOY | Brain Cancer | Central Nervous System | Medulloblastoma | |  |
| ACH-000212 | 4.8155754 | CAL120 | Breast Cancer | Breast | Breast Carcinoma | |  |
| ACH-000213 | 3.2883586 | HUPT4 | Pancreatic Cancer | Pancreas | Exocrine |  | |
| ACH-000214 | 4.8713508 | HS675T | Fibroblast | Fibroblast | Fibroblast Colorectal | | |
| ACH-000215 | 3.2735159 | LN382 | Brain Cancer | Central Nervous System | Glioma |  | |
| ACH-000216 | 2.448901 | JHESOAD1 | Esophageal Cancer | Esophagus | Esophagus Adenocarcinoma | | |
| ACH-000217 | 2.3161457 | JHH6 | Liver Cancer | Liver | Hepatocellular Carcinoma | | |
| ACH-000218 | 0.7570232 | PL21 | Leukemia | Blood | AML |  | |
| ACH-000219 | 0.7824086 | A375 | Skin Cancer | Skin | Melanoma |  | |
| ACH-000220 | 0.6599246 | MINO | Lymphoma | Lymphocyte | Non Hodgkin Lymphoma | |  |
| ACH-000221 | 1.5945485 | SNU398 | Liver Cancer | Liver | Hepatocellular Carcinoma | | |
| ACH-000222 | 5.2953557 | ASPC1 | Pancreatic Cancer | Pancreas | Exocrine |  | |
| ACH-000223 | 3.8359241 | HCC1937 | Breast Cancer | Breast | Breast Ductal Carcinoma | | |
| ACH-000224 | 5.0738202 | HS819T | Fibroblast | Fibroblast | Fibroblast Bone | |  |
| ACH-000225 | 0.3673711 | ECC12 | Gastric Cancer | Gastric | Gastric Small Cell | |  |
| ACH-000226 | 4.2935176 | SUPM2 | Lymphoma | Lymphocyte | Non Hodgkin Lymphoma | |  |
| ACH-000227 | 1.9560567 | KPNYN | Neuroblastoma | Peripheral Nervous System | Neuroblastoma | |  |
| ACH-000228 | 3.6690268 | BICR31 | Head and Neck Cancer | Upper Aerodigestive | Upper Aerodigestive Squamous | | |
| ACH-000229 | 4.2570106 | HS822T | Fibroblast | Fibroblast | Fibroblast Bone | |  |
| ACH-000230 | 3.0018022 | HS742T | Fibroblast | Fibroblast | Fibroblast Breast | |  |
| ACH-000231 | 2.3504972 | KALS1 | Brain Cancer | Central Nervous System | Glioma |  | |
| ACH-000232 | 1.7739963 | U251MG | Brain Cancer | Central Nervous System | Glioma |  | |
| ACH-000233 | 3.9532652 | DEL | Lymphoma | Lymphocyte | Non Hodgkin Lymphoma | |  |
| ACH-000234 | 5.4786483 | CAKI2 | Kidney Cancer | Kidney | Renal Cell Carcinoma | |  |
| ACH-000235 | 4.6351739 | PANC0403 | Pancreatic Cancer | Pancreas | Exocrine |  | |
| ACH-000236 | 4.0268001 | SW1417 | Colon/Colorectal Cancer | Colorectal | Colorectal Adenocarcinoma | | |
| ACH-000237 | 1.3219281 | JHOM1 | Ovarian Cancer | Ovary | Ovary Adenocarcinoma | |  |
| ACH-000238 | 2.0565835 | SCC4 | Head and Neck Cancer | Upper Aerodigestive | Upper Aerodigestive Squamous | | |
| ACH-000239 | 1.2509616 | HUG1N | Gastric Cancer | Gastric | Gastric Adenocarcinoma | | |
| ACH-000240 | 4.722466 | HS600T | Fibroblast | Fibroblast | Fibroblast Skin | |  |
| ACH-000241 | 4.6088092 | JK1 | Leukemia | Blood | CML |  | |
| ACH-000242 | 0.5655972 | RT4 | Bladder Cancer | Urinary Tract | Bladder Carcinoma | |  |
| ACH-000243 | 0.7311832 | DANG | Pancreatic Cancer | Pancreas | Exocrine |  | |
| ACH-000244 | 2.4409522 | DKMG | Brain Cancer | Central Nervous System | Glioma |  | |
| ACH-000245 | 0.8155754 | BL41 | Lymphoma | Lymphocyte | Non Hodgkin Lymphoma | |  |
| ACH-000246 | 4.1168638 | SLR23 | Kidney Cancer | Kidney | Renal Cell Carcinoma | |  |
| ACH-000247 | 5.7007171 | OCUM1 | Gastric Cancer | Gastric | Gastric Adenocarcinoma | | |
| ACH-000248 | 3.8237494 | AU565 | Breast Cancer | Breast | Breast Adenocarcinoma | | |
| ACH-000249 | 4.4937754 | CL11 | Colon/Colorectal Cancer | Colorectal | Colorectal Adenocarcinoma | | |
| ACH-000250 | 5.5276334 | KMRC20 | Kidney Cancer | Kidney | Renal Cell Carcinoma | |  |
| ACH-000251 | 4.2486866 | NCIH2887 | Lung Cancer | Lung | NSCLC |  | |
| ACH-000252 | 4.1874511 | LS1034 | Colon/Colorectal Cancer | Colorectal | Colorectal Adenocarcinoma | | |
| ACH-000253 | 3.3248106 | COLO201 | Colon/Colorectal Cancer | Colorectal | Colorectal Adenocarcinoma | | |
| ACH-000254 | 2.7376868 | SCC15 | Head and Neck Cancer | Upper Aerodigestive | Upper Aerodigestive Squamous | | |
| ACH-000255 | 4.3971184 | LMSU | Gastric Cancer | Gastric | Gastric Adenocarcinoma | | |
| ACH-000256 | 1.4059924 | COV318 | Ovarian Cancer | Ovary | Ovary Adenocarcinoma | |  |
| ACH-000257 | 3.7246503 | CORL279 | Lung Cancer | Lung | SCLC |  | |
| ACH-000258 | 3.6334312 | DU4475 | Breast Cancer | Breast | Breast Carcinoma | |  |
| ACH-000259 | 0.8479969 | KELLY | Neuroblastoma | Peripheral Nervous System | Neuroblastoma | |  |
| ACH-000260 | 2.6982185 | SKNAS | Neuroblastoma | Peripheral Nervous System | Neuroblastoma | |  |
| ACH-000261 | 3.351911 | RERFLCAI | Lung Cancer | Lung | NSCLC |  | |
| ACH-000262 | 2.4249221 | UOK101 | Kidney Cancer | Kidney | Renal Cell Carcinoma | |  |
| ACH-000263 | 0.3561438 | KASUMI1 | Leukemia | Blood | AML |  | |
| ACH-000264 | 1.6599246 | CALU6 | Lung Cancer | Lung | NSCLC |  | |
| ACH-000265 | 2.0391384 | KP4 | Pancreatic Cancer | Pancreas | Exocrine |  | |
| ACH-000266 | 1.0976108 | SNU213 | Pancreatic Cancer | Pancreas | Exocrine |  | |
| ACH-000267 | 6.0729633 | HDLM2 | Lymphoma | Lymphocyte | Hodgkin Lymphoma | |  |
| ACH-000268 | 4.1834865 | SNU245 | Bile Duct Cancer | Bile Duct | Cholangiocarcinoma | |  |
| ACH-000269 | 2.9049657 | AM38 | Brain Cancer | Central Nervous System | Glioma |  | |
| ACH-000270 | 1.3561438 | HPAC | Pancreatic Cancer | Pancreas | Exocrine |  | |
| ACH-000271 | 0.2630344 | SUDHL10 | Lymphoma | Lymphocyte | Non Hodgkin Lymphoma | |  |
| ACH-000272 | 5.4545049 | SLR24 | Kidney Cancer | Kidney | Renal Cell Carcinoma | |  |
| ACH-000273 | 3.0214797 | SF539 | Brain Cancer | Central Nervous System | Glioma |  | |
| ACH-000274 | 0.9708537 | HS852T | Skin Cancer | Skin | Melanoma |  | |
| ACH-000275 | 4.2234225 | HS834T | Fibroblast | Fibroblast | Fibroblast Skin | |  |
| ACH-000276 | 2.1795111 | HCC38 | Breast Cancer | Breast | Breast Ductal Carcinoma | | |
| ACH-000277 | 3.5789387 | HCC1419 | Breast Cancer | Breast | Breast Ductal Carcinoma | | |
| ACH-000278 | 3.8021932 | COV362 | Ovarian Cancer | Ovary | Ovary Adenocarcinoma | |  |
| ACH-000279 | 0.7655347 | EWS502 | Bone Cancer | Bone | Ewing Sarcoma | |  |
| ACH-000280 | 1.4905701 | SNU840 | Ovarian Cancer | Ovary | Brenner Tumor | |  |
| ACH-000281 | 1.6369146 | KP2 | Pancreatic Cancer | Pancreas | Exocrine |  | |
| ACH-000282 | 3.4154883 | NCIH1755 | Lung Cancer | Lung | NSCLC |  | |
| ACH-000283 | 1.2141248 | A1207 | Brain Cancer | Central Nervous System | Glioma |  | |
| ACH-000284 | 4.6564964 | HS840T | Fibroblast | Fibroblast | Fibroblast Upper Aerodigestive | | |
| ACH-000285 | 0.722466 | TOLEDO | Lymphoma | Lymphocyte | Non Hodgkin Lymphoma | |  |
| ACH-000286 | 2.784504 | SNU1033 | Colon/Colorectal Cancer | Colorectal | Colorectal Adenocarcinoma | | |
| ACH-000287 | 0.7311832 | NUDUL1 | Lymphoma | Lymphocyte | Non Hodgkin Lymphoma | |  |
| ACH-000288 | 4.1683211 | BT549 | Breast Cancer | Breast | Breast Ductal Carcinoma | | |
| ACH-000289 | 1.8439838 | SNU466 | Brain Cancer | Central Nervous System | Glioma |  | |
| ACH-000290 | 2.641546 | NCIH209 | Lung Cancer | Lung | SCLC |  | |
| ACH-000291 | 0.8559897 | OV90 | Ovarian Cancer | Ovary | Ovary Adenocarcinoma | |  |
| ACH-000292 | 3.587365 | NCIH841 | Lung Cancer | Lung | SCLC |  | |
| ACH-000293 | 1.2141248 | KLE | Endometrial/Uterine Cancer | Uterus | Endometrial Adenocarcinoma | | |
| ACH-000294 | 1.8318772 | NB4 | Leukemia | Blood | AML |  | |
| ACH-000295 | 1.6322682 | EM2 | Leukemia | Blood | CML |  | |
| ACH-000296 | 1.5753123 | OUMS23 | Colon/Colorectal Cancer | Colorectal | Colorectal Adenocarcinoma | | |
| ACH-000297 | 1.8678965 | NCIH889 | Lung Cancer | Lung | SCLC |  | |
| ACH-000298 | 2.6135317 | NCIH2029 | Lung Cancer | Lung | SCLC |  | |
| ACH-000299 | 2.6461627 | HNT34 | Leukemia | Blood | AML |  | |
| ACH-000300 | 4.803227 | SLR25 | Kidney Cancer | Kidney | Renal Cell Carcinoma | |  |
| ACH-000301 | 2.5582676 | LAMA84 | Leukemia | Blood | CML |  | |
| ACH-000302 | 2.1538053 | SNU1077 | Endometrial/Uterine Cancer | Uterus | Mullerian Carcinoma | |  |
| ACH-000303 | 6.3101583 | SNU5 | Gastric Cancer | Gastric | Gastric Adenocarcinoma | | |
| ACH-000304 | 1.1570437 | WM115 | Skin Cancer | Skin | Melanoma |  | |
| ACH-000305 | 1.5945485 | ECGI10 | Esophageal Cancer | Esophagus | Esophagus Squamous | |  |
| ACH-000306 | 4.741467 | HS688AT | Fibroblast | Fibroblast | Fibroblast Skin | |  |
| ACH-000307 | 1.5410192 | PK1 | Pancreatic Cancer | Pancreas | Exocrine |  | |
| ACH-000308 | 1.6040713 | EFO21 | Ovarian Cancer | Ovary | Ovary Adenocarcinoma | |  |
| ACH-000310 | 0.9634741 | IMR32 | Neuroblastoma | Peripheral Nervous System | Neuroblastoma | |  |
| ACH-000311 | 3.7782086 | NCIH2122 | Lung Cancer | Lung | NSCLC |  | |
| ACH-000312 | 1 | SKNBE2 | Neuroblastoma | Peripheral Nervous System | Neuroblastoma | |  |
| ACH-000313 | 5.0004508 | KMRC3 | Kidney Cancer | Kidney | Renal Cell Carcinoma | |  |
| ACH-000314 | 3.3895668 | HCC2108 | Lung Cancer | Lung | NSCLC |  | |
| ACH-000315 | 0.5945485 | KARPAS422 | Lymphoma | Lymphocyte | Non Hodgkin Lymphoma | |  |
| ACH-000316 | 4.8099289 | SNU886 | Liver Cancer | Liver | Hepatocellular Carcinoma | | |
| ACH-000317 | 5.2975583 | TUHR14TKB | Kidney Cancer | Kidney | Renal Cell Carcinoma | |  |
| ACH-000318 | 3.5716768 | TE10 | Esophageal Cancer | Esophagus | Esophagus Squamous | |  |
| ACH-000319 | 2.9653225 | MPP89 | Lung Cancer | Lung | Mesothelioma | |  |
| ACH-000320 | 1.117695 | PSN1 | Pancreatic Cancer | Pancreas | Exocrine |  | |
| ACH-000321 | 2.857981 | MOLM6 | Leukemia | Blood | CML |  | |
| ACH-000322 | 2.2927817 | HT144 | Skin Cancer | Skin | Melanoma |  | |
| ACH-000323 | 1.9671686 | 42MGBA | Brain Cancer | Central Nervous System | Glioma |  | |
| ACH-000324 | 1.9335726 | JHOC5 | Ovarian Cancer | Ovary | Ovary Adenocarcinoma | |  |
| ACH-000325 | 3.7441611 | SNU620 | Gastric Cancer | Gastric | Gastric Adenocarcinoma | | |
| ACH-000326 | 1.422233 | JURLMK1 | Leukemia | Blood | CML |  | |
| ACH-000327 | 5.3701643 | NCIH1395 | Lung Cancer | Lung | NSCLC |  | |
| ACH-000328 | 3.9680908 | LN215 | Brain Cancer | Central Nervous System | Glioma |  | |
| ACH-000329 | 3.9345165 | CCFSTTG1 | Brain Cancer | Central Nervous System | Glioma |  | |
| ACH-000330 | 1.3561438 | EFM19 | Breast Cancer | Breast | Breast Ductal Carcinoma | | |
| ACH-000331 | 4.5191644 | ISTMES2 | Lung Cancer | Lung | Mesothelioma | |  |
| ACH-000332 | 1.7782086 | YAPC | Pancreatic Cancer | Pancreas | Exocrine |  | |
| ACH-000333 | 4.6241009 | JHOM2B | Ovarian Cancer | Ovary | Ovary Adenocarcinoma | |  |
| ACH-000334 | 0.4956952 | DB | Lymphoma | Lymphocyte | Non Hodgkin Lymphoma | |  |
| ACH-000335 | 2.0214797 | MSTO211H | Lung Cancer | Lung | Mesothelioma | |  |
| ACH-000336 | 1.3895668 | OCIAML3 | Leukemia | Blood | AML |  | |
| ACH-000337 | 1.9818527 | NCIH3122 | Lung Cancer | Lung | NSCLC |  | |
| ACH-000338 | 4.3923174 | SR786 | Lymphoma | Lymphocyte | Non Hodgkin Lymphoma | |  |
| ACH-000339 | 3.5728897 | HCC461 | Lung Cancer | Lung | NSCLC |  | |
| ACH-000340 | 3.7268312 | HS870T | Fibroblast | Fibroblast | Fibroblast Bone | |  |
| ACH-000341 | 0.8155754 | SKNFI | Neuroblastoma | Peripheral Nervous System | Neuroblastoma | |  |
| ACH-000342 | 3.3659724 | CL14 | Colon/Colorectal Cancer | Colorectal | Colorectal Adenocarcinoma | | |
| ACH-000343 | 1.722466 | NCIH522 | Lung Cancer | Lung | NSCLC |  | |
| ACH-000344 | 5.9169543 | SNU668 | Gastric Cancer | Gastric | Gastric Adenocarcinoma | | |
| ACH-000345 | 1.9411063 | KPNRTBM1 | Neuroblastoma | Peripheral Nervous System | Neuroblastoma | |  |
| ACH-000346 | 0.4005379 | JVM3 | Leukemia | Blood | CLL |  | |
| ACH-000347 | 3.3701643 | QGP1 | Pancreatic Cancer | Pancreas | Endocrine |  | |
| ACH-000348 | 4.138323 | RPMI7951 | Skin Cancer | Skin | Melanoma |  | |
| ACH-000349 | 4.7543531 | HCC1500 | Breast Cancer | Breast | Breast Ductal Carcinoma | | |
| ACH-000350 | 4.0866139 | COLO678 | Colon/Colorectal Cancer | Colorectal | Colorectal Adenocarcinoma | | |
| ACH-000351 | 2.0356239 | MKN1 | Gastric Cancer | Gastric | Gastric Adenocarcinoma | | |
| ACH-000352 | 4.3412742 | HCC1428 | Breast Cancer | Breast | Breast Carcinoma | |  |
| ACH-000353 | 3.1193562 | TE15 | Esophageal Cancer | Esophagus | Esophagus Squamous | |  |
| ACH-000354 | 4.0197019 | CAPAN1 | Pancreatic Cancer | Pancreas | Exocrine |  | |
| ACH-000355 | 0.8953026 | NCIH82 | Lung Cancer | Lung | SCLC |  | |
| ACH-000356 | 2.4276062 | MKN45 | Gastric Cancer | Gastric | Gastric Adenocarcinoma | | |
| ACH-000357 | 2.448901 | JEKO1 | Lymphoma | Lymphocyte | Non Hodgkin Lymphoma | |  |
| ACH-000358 | 1.1634987 | NCIH69 | Lung Cancer | Lung | SCLC |  | |
| ACH-000359 | 2.3561438 | MG63 | Bone Cancer | Bone | Osteosarcoma | |  |
| ACH-000360 | 3.0942361 | NCIH508 | Colon/Colorectal Cancer | Colorectal | Caecum Adenocarcinoma | | |
| ACH-000361 | 4.1407787 | SKHEP1 | Liver Cancer | Liver | Hepatocellular Carcinoma | | |
| ACH-000362 | 2.7865964 | MOLM13 | Leukemia | Blood | AML |  | |
| ACH-000363 | 0.5459684 | SKMM2 | Myeloma | Plasma Cell | Multiple Myeloma | |  |
| ACH-000364 | 1.304511 | U2OS | Bone Cancer | Bone | Osteosarcoma | |  |
| ACH-000365 | 0.3334237 | SUDHL4 | Lymphoma | Lymphocyte | Non Hodgkin Lymphoma | |  |
| ACH-000366 | 1.2809563 | SKNDZ | Neuroblastoma | Peripheral Nervous System | Neuroblastoma | |  |
| ACH-000367 | 3.6170633 | NCIH226 | Lung Cancer | Lung | NSCLC |  | |
| ACH-000368 | 2.6937657 | SNU1105 | Brain Cancer | Central Nervous System | Glioma |  | |
| ACH-000369 | 2.6667566 | MOLM16 | Leukemia | Blood | AML |  | |
| ACH-000370 | 2.9107327 | SNU626 | Brain Cancer | Central Nervous System | Glioma |  | |
| ACH-000371 | 0.6040713 | RL | Lymphoma | Lymphocyte | Non Hodgkin Lymphoma | |  |
| ACH-000372 | 0.9259994 | P12ICHIKAWA | Leukemia | Blood | ALL |  | |
| ACH-000373 | 0.9335726 | SKM1 | Leukemia | Blood | AML |  | |
| ACH-000374 | 4.9429836 | HCC1143 | Breast Cancer | Breast | Breast Ductal Carcinoma | | |
| ACH-000375 | 4.1826923 | G402 | Kidney Cancer | Soft Tissue | Malignant Rhabdoid Tumor | | |
| ACH-000376 | 1.9708537 | SF295 | Brain Cancer | Central Nervous System | Glioma |  | |
| ACH-000377 | 1.3840498 | SNU478 | Bile Duct Cancer | Bile Duct | Cholangiocarcinoma | |  |
| ACH-000378 | 3.4828483 | NCIH647 | Lung Cancer | Lung | NSCLC |  | |
| ACH-000379 | 2.9107327 | NCIH1781 | Lung Cancer | Lung | NSCLC |  | |
| ACH-000380 | 0.8399596 | KMS12BM | Myeloma | Plasma Cell | Multiple Myeloma | |  |
| ACH-000381 | 4.1538053 | T84 | Colon/Colorectal Cancer | Colorectal | Colorectal Adenocarcinoma | | |
| ACH-000382 | 2.5084287 | CORL24 | Lung Cancer | Lung | SCLC |  | |
| ACH-000383 | 4.3603643 | OE33 | Esophageal Cancer | Esophagus | Esophagus Adenocarcinoma | | |
| ACH-000384 | 2.8318772 | SW780 | Bladder Cancer | Urinary Tract | Bladder Carcinoma | |  |
| ACH-000385 | 5.9359311 | SKRC20 | Kidney Cancer | Kidney | Renal Cell Carcinoma | |  |
| ACH-000386 | 0.8953026 | KG1 | Leukemia | Blood | AML |  | |
| ACH-000387 | 3.5631581 | TF1 | Leukemia | Blood | AML |  | |
| ACH-000388 | 0.4854268 | NUDHL1 | Lymphoma | Lymphocyte | Non Hodgkin Lymphoma | |  |
| ACH-000389 | 1.9486008 | H4 | Brain Cancer | Central Nervous System | Glioma |  | |
| ACH-000390 | 3.6564964 | LUDLU1 | Lung Cancer | Lung | NSCLC |  | |
| ACH-000391 | 1.3617684 | MHHES1 | Bone Cancer | Bone | Ewing Sarcoma | |  |
| ACH-000392 | 3.3419857 | CALU3 | Lung Cancer | Lung | NSCLC |  | |
| ACH-000393 | 1.3785116 | HLF | Liver Cancer | Liver | Hepatocellular Carcinoma | | |
| ACH-000394 | 2.784504 | NCIH2081 | Lung Cancer | Lung | SCLC |  | |
| ACH-000395 | 2.2078929 | NCIH520 | Lung Cancer | Lung | NSCLC |  | |
| ACH-000396 | 2.2448871 | J82 | Bladder Cancer | Urinary Tract | Bladder Carcinoma | |  |
| ACH-000397 | 2.8953026 | TEN | Endometrial/Uterine Cancer | Uterus | Clear Cell Carcinoma | |  |
| ACH-000398 | 1.1953476 | RI1 | Lymphoma | Lymphocyte | Non Hodgkin Lymphoma | |  |
| ACH-000399 | 4.3476657 | NCIH2196 | Lung Cancer | Lung | SCLC |  | |
| ACH-000400 | 3.7311832 | SKCO1 | Colon/Colorectal Cancer | Colorectal | Colorectal Adenocarcinoma | | |
| ACH-000401 | 1.2265085 | COLO800 | Skin Cancer | Skin | Melanoma |  | |
| ACH-000402 | 0.5558162 | BL70 | Lymphoma | Lymphocyte | Non Hodgkin Lymphoma | |  |
| ACH-000403 | 4.2705289 | NCIH747 | Colon/Colorectal Cancer | Colorectal | Colorectal Adenocarcinoma | | |
| ACH-000404 | 1.4382929 | K029AX | Skin Cancer | Skin | Melanoma |  | |
| ACH-000405 | 0.1110313 | MEC1 | Leukemia | Blood | CLL |  | |
| ACH-000406 | 1.2016339 | U937 | Leukemia | Blood | AML |  | |
| ACH-000407 | 1.4276062 | SNU685 | Endometrial/Uterine Cancer | Uterus | MMMT |  | |
| ACH-000408 | 0.9855004 | TE5 | Esophageal Cancer | Esophagus | Esophagus Squamous | |  |
| ACH-000409 | 3.7506065 | OVSAHO | Ovarian Cancer | Ovary | Ovary Adenocarcinoma | |  |
| ACH-000410 | 0.6870607 | SAOS2 | Bone Cancer | Bone | Osteosarcoma | |  |
| ACH-000411 | 5.0967679 | 769P | Kidney Cancer | Kidney | Renal Cell Carcinoma | |  |
| ACH-000412 | 4.0583165 | SNU1197 | Colon/Colorectal Cancer | Colorectal | Colorectal Adenocarcinoma | | |
| ACH-000413 | 3.6484654 | HS739T | Fibroblast | Fibroblast | Fibroblast Breast | |  |
| ACH-000414 | 4.6490406 | NCIH1944 | Lung Cancer | Lung | NSCLC |  | |
| ACH-000415 | 1.827819 | BICR6 | Head and Neck Cancer | Upper Aerodigestive | Upper Aerodigestive Squamous | | |
| ACH-000416 | 0.7136958 | NCIH838 | Lung Cancer | Lung | NSCLC |  | |
| ACH-000417 | 3.304511 | PANC0813 | Pancreatic Cancer | Pancreas | Exocrine |  | |
| ACH-000418 | 3.0669502 | SW1353 | Bone Cancer | Bone | Chondrosarcoma | |  |
| ACH-000419 | 1.722466 | KMS28BM | Myeloma | Plasma Cell | Multiple Myeloma | |  |
| ACH-000420 | 4.4046307 | SNU449 | Liver Cancer | Liver | Hepatocellular Carcinoma | | |
| ACH-000421 | 3.6959938 | SW837 | Colon/Colorectal Cancer | Colorectal | Colorectal Adenocarcinoma | | |
| ACH-000422 | 3.1026581 | SNU475 | Liver Cancer | Liver | Hepatocellular Carcinoma | | |
| ACH-000423 | 1.3729521 | SKMEL3 | Skin Cancer | Skin | Melanoma |  | |
| ACH-000424 | 0.6780719 | TC71 | Bone Cancer | Bone | Ewing Sarcoma | |  |
| ACH-000425 | 1.2868811 | UACC62 | Skin Cancer | Skin | Melanoma |  | |
| ACH-000427 | 1.7865964 | NCIN87 | Gastric Cancer | Gastric | Gastric Adenocarcinoma | | |
| ACH-000428 | 3.8349134 | UO31 | Kidney Cancer | Kidney | Renal Cell Carcinoma | |  |
| ACH-000429 | 5.1546156 | A704 | Kidney Cancer | Kidney | Renal Cell Carcinoma | |  |
| ACH-000430 | 0.641546 | TYKNU | Ovarian Cancer | Ovary | Ovary Adenocarcinoma | |  |
| ACH-000431 | 2.8135247 | NCIH1694 | Lung Cancer | Lung | SCLC |  | |
| ACH-000432 | 2.5801455 | BV173 | Leukemia | Blood | CML |  | |
| ACH-000433 | 3.2464081 | CAKI1 | Kidney Cancer | Kidney | Renal Cell Carcinoma | |  |
| ACH-000434 | 3.7918141 | NCIH1915 | Lung Cancer | Lung | NSCLC |  | |
| ACH-000435 | 2.6892992 | EFE184 | Endometrial/Uterine Cancer | Uterus | Endometrial Adenocarcinoma | | |
| ACH-000436 | 0.5655972 | OCIMY7 | Myeloma | Plasma Cell | Multiple Myeloma | |  |
| ACH-000437 | 2.592158 | SW1088 | Brain Cancer | Central Nervous System | Glioma |  | |
| ACH-000438 | 3.1093606 | LU65 | Lung Cancer | Lung | NSCLC |  | |
| ACH-000439 | 0.4646683 | ME1 | Leukemia | Blood | AML |  | |
| ACH-000440 | 0.4541759 | CA46 | Lymphoma | Lymphocyte | Non Hodgkin Lymphoma | |  |
| ACH-000441 | 2.3895668 | SH4 | Skin Cancer | Skin | Melanoma |  | |
| ACH-000442 | 2.1243281 | RERFLCSQ1 | Lung Cancer | Lung | NSCLC |  | |
| ACH-000443 | 3.7441611 | OVKATE | Ovarian Cancer | Ovary | Ovary Adenocarcinoma | |  |
| ACH-000444 | 1.2448871 | LU99 | Lung Cancer | Lung | NSCLC |  | |
| ACH-000445 | 4.3533233 | KNS60 | Brain Cancer | Central Nervous System | Glioma |  | |
| ACH-000446 | 2.5335633 | KPNSI9S | Neuroblastoma | Peripheral Nervous System | Neuroblastoma | |  |
| ACH-000447 | 4.0373822 | NCIH2228 | Lung Cancer | Lung | NSCLC |  | |
| ACH-000448 | 2.560715 | NCIH1666 | Lung Cancer | Lung | NSCLC |  | |
| ACH-000449 | 2.8135247 | MESSA | Sarcoma | Soft Tissue | Uterine Sarcoma | |  |
| ACH-000450 | 1.2387869 | MELHO | Skin Cancer | Skin | Melanoma |  | |
| ACH-000451 | 1.811471 | NCIH2085 | Lung Cancer | Lung | NSCLC |  | |
| ACH-000452 | 3.1440464 | TE8 | Esophageal Cancer | Esophagus | Esophagus Squamous | |  |
| ACH-000453 | 0.3219281 | MOLP2 | Myeloma | Plasma Cell | Multiple Myeloma | |  |
| ACH-000454 | 1.2448871 | HCC95 | Lung Cancer | Lung | NSCLC |  | |
| ACH-000455 | 2.3219281 | LN428 | Brain Cancer | Central Nervous System | Glioma |  | |
| ACH-000456 | 2.65764 | BCPAP | Thyroid Cancer | Thyroid | Thyroid Carcinoma | |  |
| ACH-000457 | 5.0600474 | CAL54 | Kidney Cancer | Kidney | Renal Cell Carcinoma | |  |
| ACH-000458 | 0.8718436 | CJM | Skin Cancer | Skin | Melanoma |  | |
| ACH-000459 | 5.1403697 | TUHR10TKB | Kidney Cancer | Kidney | Renal Cell Carcinoma | |  |
| ACH-000460 | 1.3448285 | SNU8 | Ovarian Cancer | Ovary | Ovary Adenocarcinoma | |  |
| ACH-000461 | 2.3868109 | SNU1196 | Bile Duct Cancer | Bile Duct | Cholangiocarcinoma | |  |
| ACH-000462 | 0.4646683 | NALM1 | Leukemia | Blood | CML |  | |
| ACH-000463 | 3.4918531 | NCIH460 | Lung Cancer | Lung | NSCLC |  | |
| ACH-000464 | 1.6735564 | CAS1 | Brain Cancer | Central Nervous System | Glioma |  | |
| ACH-000465 | 0.6959938 | SKMEL1 | Skin Cancer | Skin | Melanoma |  | |
| ACH-000466 | 1.7484612 | SNU216 | Gastric Cancer | Gastric | Gastric Adenocarcinoma | | |
| ACH-000467 | 3.9307373 | HCC56 | Colon/Colorectal Cancer | Colorectal | Colorectal Adenocarcinoma | | |
| ACH-000468 | 3.7092906 | PK45H | Pancreatic Cancer | Pancreas | Exocrine |  | |
| ACH-000469 | 2.8599695 | YH13 | Brain Cancer | Central Nervous System | Glioma |  | |
| ACH-000470 | 1.4329594 | SW1463 | Colon/Colorectal Cancer | Colorectal | Colorectal Adenocarcinoma | | |
| ACH-000471 | 1.8519988 | LI7 | Liver Cancer | Liver |  | | |
| ACH-000472 | 0.7484612 | HSC2 | Head and Neck Cancer | Upper Aerodigestive | Upper Aerodigestive Squamous | | |
| ACH-000473 | 0.9634741 | RT112 | Bladder Cancer | Urinary Tract | Bladder Carcinoma | |  |
| ACH-000475 | 5.0214797 | HUH1 | Liver Cancer | Liver | Hepatocellular Carcinoma | | |
| ACH-000476 | 4.6559242 | JHH4 | Liver Cancer | Liver | Hepatocellular Carcinoma | | |
| ACH-000477 | 5.3540289 | MALME3M | Skin Cancer | Skin | Melanoma |  | |
| ACH-000478 | 4.2839218 | SNU387 | Liver Cancer | Liver | Hepatocellular Carcinoma | | |
| ACH-000479 | 1.9855004 | KNS81 | Brain Cancer | Central Nervous System | Glioma |  | |
| ACH-000480 | 3.7103932 | HUH7 | Liver Cancer | Liver | Hepatocellular Carcinoma | | |
| ACH-000481 | 3.6311043 | NCIH2170 | Lung Cancer | Lung | NSCLC |  | |
| ACH-000482 | 4.4711875 | RERFLCKJ | Lung Cancer | Lung | NSCLC |  | |
| ACH-000483 | 4.2727697 | SNU182 | Liver Cancer | Liver | Hepatocellular Carcinoma | | |
| ACH-000484 | 6.1592659 | VMRCRCW | Kidney Cancer | Kidney | Renal Cell Carcinoma | |  |
| ACH-000485 | 3.7516779 | GSU | Gastric Cancer | Gastric | Gastric Adenocarcinoma | | |
| ACH-000486 | 1.7004397 | KU1919 | Bladder Cancer | Urinary Tract | Bladder Carcinoma | |  |
| ACH-000487 | 2.1276333 | F36P | Leukemia | Blood | AML |  | |
| ACH-000488 | 1.7865964 | TE11 | Esophageal Cancer | Esophagus | Esophagus Squamous | |  |
| ACH-000489 | 2.3015876 | SW1116 | Colon/Colorectal Cancer | Colorectal | Colorectal Adenocarcinoma | | |
| ACH-000490 | 1.2387869 | SF767 | Brain Cancer | Central Nervous System | Glioma |  | |
| ACH-000491 | 1.2690331 | NCIH716 | Colon/Colorectal Cancer | Colorectal | Colorectal Adenocarcinoma | | |
| ACH-000492 | 0.9030383 | MUTZ5 | Leukemia | Blood | ALL |  | |
| ACH-000493 | 4.129283 | SNU423 | Liver Cancer | Liver | Hepatocellular Carcinoma | | |
| ACH-000494 | 4.0686708 | OELE | Engineered | Engineered Ovary | |  | |
| ACH-000495 | 5.3179552 | TUHR4TKB | Kidney Cancer | Kidney | Renal Cell Carcinoma | |  |
| ACH-000496 | 5.5326287 | NCIH1792 | Lung Cancer | Lung | NSCLC |  | |
| ACH-000498 | 0.5945485 | KO52 | Leukemia | Blood | AML |  | |
| ACH-000499 | 0.9030383 | EW8 | Bone Cancer | Bone | Ewing Sarcoma | |  |
| ACH-000500 | 3.7333543 | SNU46 | Head and Neck Cancer | Upper Aerodigestive | Upper Aerodigestive Squamous | | |
| ACH-000501 | 3.499527 | LS123 | Colon/Colorectal Cancer | Colorectal | Colorectal Adenocarcinoma | | |
| ACH-000502 | 4.4646683 | TCCPAN2 | Pancreatic Cancer | Pancreas | Exocrine |  | |
| ACH-000503 | 1.790772 | BICR16 | Head and Neck Cancer | Upper Aerodigestive | Upper Aerodigestive Squamous | | |
| ACH-000504 | 2.2690331 | SNB75 | Brain Cancer | Central Nervous System | Glioma |  | |
| ACH-000505 | 1.2630344 | RKN | Sarcoma | Soft Tissue | Leiomyosarcoma | |  |
| ACH-000506 | 3.6587827 | NCIH146 | Lung Cancer | Lung | SCLC |  | |
| ACH-000507 | 4.4100697 | KE39 | Gastric Cancer | Gastric | Gastric Adenocarcinoma | | |
| ACH-000508 | 1.8991756 | CORL88 | Lung Cancer | Lung | SCLC |  | |
| ACH-000509 | 0.8639385 | HUT78 | Lymphoma | Lymphocyte | Non Hodgkin Lymphoma | |  |
| ACH-000510 | 1.3785116 | NCIH1299 | Lung Cancer | Lung | NSCLC |  | |
| ACH-000511 | 4.2441259 | CALU1 | Lung Cancer | Lung | NSCLC |  | |
| ACH-000512 | 0.6507646 | INA6 | Myeloma | Plasma Cell | Multiple Myeloma | |  |
| ACH-000513 | 4.9183862 | SNU1272 | Kidney Cancer | Kidney | Renal Cell Carcinoma | |  |
| ACH-000514 | 1.9221978 | NCIH1092 | Lung Cancer | Lung | SCLC |  | |
| ACH-000515 | 2.1634987 | HCC33 | Lung Cancer | Lung | SCLC |  | |
| ACH-000516 | 3.2016339 | CAL78 | Bone Cancer | Bone | Chondrosarcoma | |  |
| ACH-000517 | 4.6599246 | SNU410 | Pancreatic Cancer | Pancreas | Exocrine |  | |
| ACH-000518 | 3.2854022 | CAL33 | Head and Neck Cancer | Upper Aerodigestive | Upper Aerodigestive Squamous | | |
| ACH-000519 | 0.9335726 | PEER | Leukemia | Blood | ALL |  | |
| ACH-000520 | 1.4168397 | 59M | Ovarian Cancer | Ovary | Ovary Adenocarcinoma | |  |
| ACH-000521 | 5.9602337 | NCIH2030 | Lung Cancer | Lung | NSCLC |  | |
| ACH-000522 | 0.9411063 | UMUC3 | Bladder Cancer | Urinary Tract | Bladder Carcinoma | |  |
| ACH-000523 | 1.9068906 | NCIH1184 | Lung Cancer | Lung | SCLC |  | |
| ACH-000524 | 2.7311832 | KURAMOCHI | Ovarian Cancer | Ovary | Ovary Adenocarcinoma | |  |
| ACH-000525 | 2.4750849 | NCIH2171 | Lung Cancer | Lung | SCLC |  | |
| ACH-000526 | 3.116032 | HS821T | Fibroblast | Fibroblast | Fibroblast Bone | |  |
| ACH-000527 | 1.8237494 | OVISE | Ovarian Cancer | Ovary | Ovary Adenocarcinoma | |  |
| ACH-000528 | 0.9411063 | ABC1 | Lung Cancer | Lung | NSCLC |  | |
| ACH-000529 | 4.5014391 | T173 | Fibroblast | Fibroblast | Fibroblast Bone | |  |
| ACH-000530 | 0.722466 | DMS114 | Lung Cancer | Lung | SCLC |  | |
| ACH-000531 | 3.8094144 | RS5 | Fibroblast | Fibroblast | Fibroblast Lung | |  |
| ACH-000532 | 2.8698714 | SNU61 | Colon/Colorectal Cancer | Colorectal | Colorectal Adenocarcinoma | | |
| ACH-000533 | 3.5533605 | NCIH2004RT | Rhabdoid | Soft Tissue | Malignant Rhabdoid Tumor | | |
| ACH-000534 | 0.2141248 | WSUDLCL2 | Lymphoma | Lymphocyte | Non Hodgkin Lymphoma | |  |
| ACH-000535 | 2.1043367 | BXPC3 | Pancreatic Cancer | Pancreas | Exocrine |  | |
| ACH-000536 | 5.1068508 | BT20 | Breast Cancer | Breast | Breast Ductal Carcinoma | | |
| ACH-000537 | 4.9959367 | SNU761 | Liver Cancer | Liver | Hepatocellular Carcinoma | | |
| ACH-000538 | 1.3785116 | HUTU80 | Gastric Cancer | Gastric | Duodenal Adenocarcinoma | | |
| ACH-000539 | 4.4025858 | HS618T | Fibroblast | Fibroblast | Fibroblast Lung | |  |
| ACH-000540 | 3.8599695 | HS606T | Fibroblast | Fibroblast | Fibroblast Breast | |  |
| ACH-000541 | 0.3448285 | KMS34 | Myeloma | Plasma Cell | Multiple Myeloma | |  |
| ACH-000542 | 0.8479969 | HEYA8 | Ovarian Cancer | Ovary | Ovary Adenocarcinoma | |  |
| ACH-000543 | 3.2464081 | SNU489 | Brain Cancer | Central Nervous System | Glioma |  | |
| ACH-000544 | 0.8073549 | OE21 | Esophageal Cancer | Esophagus | Esophagus Squamous | |  |
| ACH-000545 | 2.9800253 | VMCUB1 | Bladder Cancer | Urinary Tract | Bladder Carcinoma | |  |
| ACH-000546 | 2.0071955 | HSC4 | Head and Neck Cancer | Upper Aerodigestive | Upper Aerodigestive Squamous | | |
| ACH-000547 | 2.9202933 | HT1197 | Bladder Cancer | Urinary Tract | Bladder Carcinoma | |  |
| ACH-000548 | 2.6959938 | BHY | Head and Neck Cancer | Upper Aerodigestive | Upper Aerodigestive Squamous | | |
| ACH-000549 | 0.9708537 | SNU1076 | Head and Neck Cancer | Upper Aerodigestive | Upper Aerodigestive Squamous | | |
| ACH-000550 | 3.5909612 | IGR39 | Skin Cancer | Skin | Melanoma |  | |
| ACH-000551 | 4.5686402 | K562 | Leukemia | Blood | CML |  | |
| ACH-000552 | 2.6892992 | HT29 | Colon/Colorectal Cancer | Colorectal | Colorectal Adenocarcinoma | | |
| ACH-000553 | 3.8806855 | SQ1 | Lung Cancer | Lung | NSCLC |  | |
| ACH-000554 | 2.0908534 | UACC893 | Breast Cancer | Breast | Breast Ductal Carcinoma | | |
| ACH-000555 | 4.3319918 | A498 | Kidney Cancer | Kidney | Renal Cell Carcinoma | |  |
| ACH-000556 | 2.6507646 | SIHA | Cervical Cancer | Cervix | Cervical Carcinoma | |  |
| ACH-000557 | 1.448901 | AML193 | Leukemia | Blood | AML |  | |
| ACH-000558 | 4.0435195 | A172 | Brain Cancer | Central Nervous System | Glioma |  | |
| ACH-000559 | 2.7484612 | NCIH1836 | Lung Cancer | Lung | SCLC |  | |
| ACH-000560 | 2.9354597 | ECC10 | Gastric Cancer | Gastric | Gastric Small Cell | |  |
| ACH-000561 | 3.7687137 | TDOTT | Esophageal Cancer | Esophagus | Esophagus Squamous | |  |
| ACH-000562 | 4.7398481 | HCC78 | Lung Cancer | Lung | NSCLC |  | |
| ACH-000563 | 4.7420062 | EBC1 | Lung Cancer | Lung | NSCLC |  | |
| ACH-000564 | 0.2387869 | KHM1B | Myeloma | Plasma Cell | Multiple Myeloma | |  |
| ACH-000565 | 3.5397792 | RCM1 | Colon/Colorectal Cancer | Colorectal | Colorectal Adenocarcinoma | | |
| ACH-000566 | 4.6311043 | SW1710 | Bladder Cancer | Urinary Tract | Bladder Carcinoma | |  |
| ACH-000567 | 0.6870607 | ST486 | Lymphoma | Lymphocyte | Non Hodgkin Lymphoma | |  |
| ACH-000568 | 1.0143553 | UACC812 | Breast Cancer | Breast | Breast Ductal Carcinoma | | |
| ACH-000569 | 3.8449882 | ISTMES1 | Lung Cancer | Lung | Mesothelioma | |  |
| ACH-000570 | 1.9963887 | YKG1 | Brain Cancer | Central Nervous System | Glioma |  | |
| ACH-000571 | 3.2630344 | T98G | Brain Cancer | Central Nervous System | Glioma |  | |
| ACH-000572 | 1.3219281 | G361 | Skin Cancer | Skin | Melanoma |  | |
| ACH-000573 | 6.2448871 | MDAMB436 | Breast Cancer | Breast | Breast Carcinoma | |  |
| ACH-000574 | 2.0703893 | FUOV1 | Ovarian Cancer | Ovary | Ovary Adenocarcinoma | |  |
| ACH-000575 | 5.4918531 | HCC364 | Lung Cancer | Lung | NSCLC |  | |
| ACH-000576 | 0.3785116 | KMS27 | Myeloma | Plasma Cell | Multiple Myeloma | |  |
| ACH-000577 | 5.8270568 | JHH2 | Liver Cancer | Liver | Hepatocellular Carcinoma | | |
| ACH-000578 | 4.4482402 | HCC1171 | Lung Cancer | Lung | NSCLC |  | |
| ACH-000579 | 1.077243 | UACC257 | Skin Cancer | Skin | Melanoma |  | |
| ACH-000580 | 1.3276874 | C32 | Skin Cancer | Skin | Melanoma |  | |
| ACH-000581 | 3.2156786 | SNU16 | Gastric Cancer | Gastric | Gastric Adenocarcinoma | | |
| ACH-000582 | 1.5058909 | COLO741 | Skin Cancer | Skin | Melanoma |  | |
| ACH-000583 | 0.1634987 | MC116 | Lymphoma | Lymphocyte | Non Hodgkin Lymphoma | |  |
| ACH-000584 | 3.2403143 | JHOS4 | Ovarian Cancer | Ovary | Ovary Adenocarcinoma | |  |
| ACH-000585 | 1.2265085 | EPLC272H | Lung Cancer | Lung | NSCLC |  | |
| ACH-000586 | 2.5360529 | NCIH1876 | Lung Cancer | Lung | SCLC |  | |
| ACH-000587 | 4.6976626 | NCIH1975 | Lung Cancer | Lung | NSCLC |  | |
| ACH-000588 | 0.3561438 | KMS26 | Myeloma | Plasma Cell | Multiple Myeloma | |  |
| ACH-000589 | 3.3348543 | NCIH1437 | Lung Cancer | Lung | NSCLC |  | |
| ACH-000590 | 4.9169543 | NCIH2073 | Lung Cancer | Lung | NSCLC |  | |
| ACH-000591 | 2.22033 | LN235 | Brain Cancer | Central Nervous System | Glioma |  | |
| ACH-000592 | 1.1634987 | TM31 | Brain Cancer | Central Nervous System | Glioma |  | |
| ACH-000593 | 1.1634987 | BC3C | Bladder Cancer | Urinary Tract | Bladder Carcinoma | |  |
| ACH-000594 | 3.8884997 | DMS153 | Lung Cancer | Lung | SCLC |  | |
| ACH-000595 | 2.0285692 | LN229 | Brain Cancer | Central Nervous System | Glioma |  | |
| ACH-000596 | 3.0321008 | LCLC97TM1 | Lung Cancer | Lung | NSCLC |  | |
| ACH-000597 | 2.3248106 | TTC709 | Rhabdoid | Soft Tissue | Malignant Rhabdoid Tumor | | |
| ACH-000598 | 0.2141248 | KMS21BM | Myeloma | Plasma Cell | Multiple Myeloma | |  |
| ACH-000599 | 2.2509616 | PATU8902 | Pancreatic Cancer | Pancreas | Exocrine |  | |
| ACH-000600 | 5.2982917 | SLR26 | Kidney Cancer | Kidney | Renal Cell Carcinoma | |  |
| ACH-000601 | 4.9690123 | MIAPACA2 | Pancreatic Cancer | Pancreas | Exocrine |  | |
| ACH-000602 | 2.2986583 | M07E | Leukemia | Blood | AML |  | |
| ACH-000603 | 4.7360636 | BEN | Lung Cancer | Lung | NSCLC |  | |
| ACH-000604 | 3.3617684 | KYO1 | Leukemia | Blood | CML |  | |
| ACH-000605 | 2.3533233 | TE6 | Esophageal Cancer | Esophagus | Esophagus Squamous | |  |
| ACH-000606 | 2.0179219 | PECAPJ34CLONEC12 | Head and Neck Cancer | Upper Aerodigestive | Upper Aerodigestive Squamous | | |
| ACH-000607 | 2.9354597 | KYM1 | Rhabdoid | Soft Tissue | Malignant Rhabdoid Tumor | | |
| ACH-000608 | 3.5521311 | COV644 | Ovarian Cancer | Ovary | Ovary Adenocarcinoma | |  |
| ACH-000609 | 2.8011587 | SF126 | Brain Cancer | Central Nervous System | Glioma |  | |
| ACH-000610 | 2.8217102 | NCIH2227 | Lung Cancer | Lung | SCLC |  | |
| ACH-000611 | 0.5459684 | SUDHL6 | Lymphoma | Lymphocyte | Non Hodgkin Lymphoma | |  |
| ACH-000612 | 4.5813512 | HUT102 | Lymphoma | Lymphocyte | Lymphoma Unspecified | |  |
| ACH-000613 | 0.4114262 | HOS | Bone Cancer | Bone | Osteosarcoma | |  |
| ACH-000614 | 1.6870607 | RVH421 | Skin Cancer | Skin | Melanoma |  | |
| ACH-000615 | 2.790772 | SKMEL28 | Skin Cancer | Skin | Melanoma |  | |
| ACH-000616 | 3.6276068 | HS746T | Gastric Cancer | Gastric | Gastric Adenocarcinoma | | |
| ACH-000617 | 2.2927817 | OVCAR4 | Ovarian Cancer | Ovary | Ovary Adenocarcinoma | |  |
| ACH-000618 | 1.5801455 | SNU1041 | Head and Neck Cancer | Upper Aerodigestive | Upper Aerodigestive Squamous | | |
| ACH-000619 | 2.3840498 | PECAPJ15 | Head and Neck Cancer | Upper Aerodigestive | Upper Aerodigestive Squamous | | |
| ACH-000620 | 2.6299394 | JHH1 | Liver Cancer | Liver | Hepatocellular Carcinoma | | |
| ACH-000621 | 2.1407787 | MDAMB157 | Breast Cancer | Breast | Breast Ductal Carcinoma | | |
| ACH-000622 | 2.3362834 | KNS42 | Brain Cancer | Central Nervous System | Glioma |  | |
| ACH-000623 | 2.3219281 | SNU201 | Brain Cancer | Central Nervous System | Glioma |  | |
| ACH-000624 | 2.2047668 | HCC1806 | Breast Cancer | Breast | Breast Ductal Carcinoma | | |
| ACH-000625 | 5.3377111 | HEP3B217 | Liver Cancer | Liver | Hepatocellular Carcinoma | | |
| ACH-000626 | 1.2809563 | U266B1 | Myeloma | Plasma Cell | Multiple Myeloma | |  |
| ACH-000627 | 5.0316599 | LCLC103H | Lung Cancer | Lung | NSCLC |  | |
| ACH-000628 | 5.197315 | NCIH596 | Lung Cancer | Lung | NSCLC |  | |
| ACH-000629 | 5.0373822 | IOMMLEE | Brain Cancer | Central Nervous System | Meningioma |  | |
| ACH-000630 | 3.6859401 | YD8 | Head and Neck Cancer | Upper Aerodigestive | Upper Aerodigestive Squamous | | |
| ACH-000631 | 2.8972404 | KS1 | Brain Cancer | Central Nervous System | Glioma |  | |
| ACH-000632 | 2.5160151 | HS944T | Skin Cancer | Skin | Melanoma |  | |
| ACH-000633 | 4.4154883 | FU97 | Gastric Cancer | Gastric | Gastric Adenocarcinoma | | |
| ACH-000634 | 1.6690268 | LN340 | Brain Cancer | Central Nervous System | Glioma |  | |
| ACH-000635 | 4.3624699 | SNU119 | Ovarian Cancer | Ovary | Ovary Adenocarcinoma | |  |
| ACH-000636 | 0.3673711 | RPMI8402 | Leukemia | Blood | ALL |  | |
| ACH-000637 | 3.6322682 | KYSE520 | Esophageal Cancer | Esophagus | Esophagus Squamous | |  |
| ACH-000638 | 5.2946207 | NCIH441 | Lung Cancer | Lung | NSCLC |  | |
| ACH-000639 | 3.0161397 | NCIH211 | Lung Cancer | Lung | SCLC |  | |
| ACH-000640 | 0.8237494 | SKMEL31 | Skin Cancer | Skin | Melanoma |  | |
| ACH-000641 | 2.2898345 | CMK | Leukemia | Blood | AML |  | |
| ACH-000642 | 2.7202785 | HMEL | Engineered | Engineered Breast | |  | |
| ACH-000643 | 3.1795111 | HDQP1 | Breast Cancer | Breast | Breast Ductal Carcinoma | | |
| ACH-000644 | 2.3103401 | COLO829 | Skin Cancer | Skin | Melanoma |  | |
| ACH-000645 | 6.0424255 | JL1 | Lung Cancer | Lung | Mesothelioma | |  |
| ACH-000646 | 2.3673711 | OVMANA | Ovarian Cancer | Ovary | Ovary Adenocarcinoma | |  |
| ACH-000647 | 3.8318772 | TE1 | Esophageal Cancer | Esophagus | Esophagus Squamous | |  |
| ACH-000648 | 3.4100697 | NCIH28 | Lung Cancer | Lung | Mesothelioma | |  |
| ACH-000649 | 3.2630344 | 786O | Kidney Cancer | Kidney | Renal Cell Carcinoma | |  |
| ACH-000650 | 1.304511 | IGR37 | Skin Cancer | Skin | Melanoma |  | |
| ACH-000651 | 3.9616233 | SW620 | Colon/Colorectal Cancer | Colorectal | Colorectal Adenocarcinoma | | |
| ACH-000652 | 3.3840498 | SUIT2 | Pancreatic Cancer | Pancreas | Exocrine |  | |
| ACH-000653 | 0.3219281 | JJN3 | Myeloma | Plasma Cell | Multiple Myeloma | |  |
| ACH-000654 | 1.22033 | RAJI | Lymphoma | Lymphocyte | Non Hodgkin Lymphoma | |  |
| ACH-000655 | 1.1243281 | SF268 | Brain Cancer | Central Nervous System | Glioma |  | |
| ACH-000656 | 0.3785116 | SUDHL8 | Lymphoma | Lymphocyte | Non Hodgkin Lymphoma | |  |
| ACH-000657 | 1.9068906 | A2780 | Ovarian Cancer | Ovary | Ovary Adenocarcinoma | |  |
| ACH-000659 | 3.3798982 | SCLC21H | Lung Cancer | Lung | SCLC |  | |
| ACH-000660 | 0.7739963 | SUDHL5 | Lymphoma | Lymphocyte | Non Hodgkin Lymphoma | |  |
| ACH-000661 | 1.0908534 | WM1799 | Skin Cancer | Skin | Melanoma |  | |
| ACH-000662 | 4.5891642 | CORL23 | Lung Cancer | Lung | NSCLC |  | |
| ACH-000663 | 2.0942361 | OVTOKO | Ovarian Cancer | Ovary | Ovary Adenocarcinoma | |  |
| ACH-000664 | 3.8318772 | SUDHL1 | Lymphoma | Lymphocyte | Non Hodgkin Lymphoma | |  |
| ACH-000665 | 3.9855004 | SKMES1 | Lung Cancer | Lung | NSCLC |  | |
| ACH-000666 | 3.0840643 | NCIH1355 | Lung Cancer | Lung | NSCLC |  | |
| ACH-000667 | 2.8659188 | HCC44 | Lung Cancer | Lung | NSCLC |  | |
| ACH-000668 | 5.7260137 | HCC70 | Breast Cancer | Breast | Breast Ductal Carcinoma | | |
| ACH-000669 | 3.6040713 | SW900 | Lung Cancer | Lung | NSCLC |  | |
| ACH-000670 | 3.803227 | SBC5 | Lung Cancer | Lung | SCLC |  | |
| ACH-000671 | 1.5008021 | HUH6 | Liver Cancer | Liver | Hepatoblastoma | |  |
| ACH-000672 | 3.5096958 | IALM | Lung Cancer | Lung | NSCLC |  | |
| ACH-000673 | 1.6182387 | LN443 | Brain Cancer | Central Nervous System | Glioma |  | |
| ACH-000674 | 4.2486866 | NUGC4 | Gastric Cancer | Gastric | Gastric Adenocarcinoma | | |
| ACH-000675 | 3.1795111 | NCIH1734 | Lung Cancer | Lung | NSCLC |  | |
| ACH-000676 | 2.2839218 | LN464 | Brain Cancer | Central Nervous System | Glioma |  | |
| ACH-000677 | 3.1779178 | SW1573 | Lung Cancer | Lung | NSCLC |  | |
| ACH-000678 | 3.5801455 | MKN7 | Gastric Cancer | Gastric | Gastric Adenocarcinoma | | |
| ACH-000679 | 3.1193562 | OE19 | Esophageal Cancer | Esophagus | Esophagus Squamous | |  |
| ACH-000680 | 3.0214797 | SW948 | Colon/Colorectal Cancer | Colorectal | Colorectal Adenocarcinoma | | |
| ACH-000681 | 3.6814493 | A549 | Lung Cancer | Lung | NSCLC |  | |
| ACH-000682 | 1.1243281 | SNU1066 | Head and Neck Cancer | Upper Aerodigestive | Upper Aerodigestive Squamous | | |
| ACH-000683 | 1.2265085 | SNU503 | Colon/Colorectal Cancer | Colorectal | Colorectal Adenocarcinoma | | |
| ACH-000684 | 4.7004397 | KMRC1 | Kidney Cancer | Kidney | Renal Cell Carcinoma | |  |
| ACH-000685 | 4.4679315 | L33 | Pancreatic Cancer | Pancreas | Exocrine |  | |
| ACH-000686 | 4.2387869 | SNU878 | Liver Cancer | Liver | Hepatocellular Carcinoma | | |
| ACH-000687 | 0.4750849 | CI1 | Lymphoma | Lymphocyte | Non Hodgkin Lymphoma | |  |
| ACH-000688 | 3.6780719 | OV7 | Ovarian Cancer | Ovary | Ovary Adenocarcinoma | |  |
| ACH-000689 | 3.8845979 | RH18 | Sarcoma | Soft Tissue | Rhabdomyosarcoma | |  |
| ACH-000690 | 2.3476657 | HCC2814 | Lung Cancer | Lung | NSCLC |  | |
| ACH-000691 | 2.8972404 | HCC2157 | Breast Cancer | Breast | Breast Ductal Carcinoma | | |
| ACH-000692 | 2.1473067 | SNU899 | Head and Neck Cancer | Upper Aerodigestive | Upper Aerodigestive Squamous | | |
| ACH-000693 | 1.3950628 | KYSE180 | Esophageal Cancer | Esophagus | Esophagus Squamous | |  |
| ACH-000694 | 1.9708537 | TE9 | Esophageal Cancer | Esophagus | Esophagus Squamous | |  |
| ACH-000695 | 1.9560567 | CORL47 | Lung Cancer | Lung | SCLC |  | |
| ACH-000696 | 3.117695 | OVCAR8 | Ovarian Cancer | Ovary | Ovary Adenocarcinoma | |  |
| ACH-000697 | 0.9634741 | A3KAW | Lymphoma | Lymphocyte | Non Hodgkin Lymphoma | |  |
| ACH-000698 | 3.598127 | DMS53 | Lung Cancer | Lung | SCLC |  | |
| ACH-000699 | 4.6276068 | HCC1395 | Breast Cancer | Breast | Breast Ductal Carcinoma | | |
| ACH-000700 | 4.0942361 | NCIH2882 | Lung Cancer | Lung | NSCLC |  | |
| ACH-000701 | 2.3757345 | RMUGS | Ovarian Cancer | Ovary | Ovary Adenocarcinoma | |  |
| ACH-000702 | 1.1375035 | L1236 | Lymphoma | Lymphocyte | Hodgkin Lymphoma | |  |
| ACH-000703 | 3.0635029 | DMS79 | Lung Cancer | Lung | SCLC |  | |
| ACH-000704 | 2.6088092 | OAW42 | Ovarian Cancer | Ovary | Ovary Carcinoma | |  |
| ACH-000705 | 4.3930043 | LC1F | Lung Cancer | Lung | NSCLC |  | |
| ACH-000706 | 5.4992081 | EKVX | Lung Cancer | Lung | NSCLC |  | |
| ACH-000707 | 1.4059924 | P3HR1 | Lymphoma | Lymphocyte | Non Hodgkin Lymphoma | |  |
| ACH-000708 | 4.2539893 | SNU283 | Colon/Colorectal Cancer | Colorectal | Colorectal Adenocarcinoma | | |
| ACH-000709 | 4.9574503 | KMRC2 | Kidney Cancer | Kidney | Renal Cell Carcinoma | |  |
| ACH-000710 | 3.0617762 | NCIH854 | Lung Cancer | Lung | NSCLC |  | |
| ACH-000711 | 1.1634987 | JIMT1 | Breast Cancer | Breast | Breast Ductal Carcinoma | | |
| ACH-000712 | 6.2979251 | HCC1833 | Lung Cancer | Lung | NSCLC |  | |
| ACH-000713 | 4.5065258 | CAOV3 | Ovarian Cancer | Ovary | Ovary Adenocarcinoma | |  |
| ACH-000714 | 0.8073549 | KMS11 | Myeloma | Plasma Cell | Multiple Myeloma | |  |
| ACH-000715 | 2.1210154 | SNU1214 | Head and Neck Cancer | Upper Aerodigestive | Upper Aerodigestive Squamous | | |
| ACH-000716 | 3.1937717 | TT2609C02 | Thyroid Cancer | Thyroid | Thyroid Carcinoma | |  |
| ACH-000717 | 2.6553518 | COLO680N | Esophageal Cancer | Esophagus | Esophagus Squamous | |  |
| ACH-000718 | 5.255123 | NCIH2291 | Lung Cancer | Lung | NSCLC |  | |
| ACH-000719 | 0.6780719 | RMGI | Ovarian Cancer | Ovary | Ovary Adenocarcinoma | |  |
| ACH-000720 | 3.4382929 | TCCSUP | Bladder Cancer | Urinary Tract | Bladder Carcinoma | |  |
| ACH-000721 | 2.9049657 | HMC18 | Breast Cancer | Breast | Breast Carcinoma | |  |
| ACH-000722 | 2.4409522 | SNUC1 | Colon/Colorectal Cancer | Colorectal | Colorectal Adenocarcinoma | | |
| ACH-000723 | 0.9560567 | YD10B | Head and Neck Cancer | Upper Aerodigestive | Upper Aerodigestive Squamous | | |
| ACH-000724 | 4.7114949 | HT1376 | Bladder Cancer | Urinary Tract | Bladder Carcinoma | |  |
| ACH-000725 | 4.8419731 | HCC202 | Breast Cancer | Breast | Breast Ductal Carcinoma | | |
| ACH-000726 | 2.4302853 | TE14 | Esophageal Cancer | Esophagus | Esophagus Squamous | |  |
| ACH-000728 | 0.8073549 | KASUMI2 | Leukemia | Blood | ALL |  | |
| ACH-000729 | 1.7398481 | NCIH1963 | Lung Cancer | Lung | SCLC |  | |
| ACH-000730 | 1.4436067 | SKMEL5 | Skin Cancer | Skin | Melanoma |  | |
| ACH-000731 | 5.0071955 | HCC2279 | Lung Cancer | Lung | NSCLC |  | |
| ACH-000732 | 2.0143553 | PECAPJ41CLONED2 | Head and Neck Cancer | Upper Aerodigestive | Upper Aerodigestive Squamous | | |
| ACH-000733 | 5.9219599 | NCIH1838 | Lung Cancer | Lung | NSCLC |  | |
| ACH-000734 | 2.5945485 | JHH5 | Liver Cancer | Liver | Hepatocellular Carcinoma | | |
| ACH-000735 | 2.3103401 | PECAPJ49 | Head and Neck Cancer | Upper Aerodigestive | Upper Aerodigestive Squamous | | |
| ACH-000736 | 4.2326608 | SNU601 | Gastric Cancer | Gastric | Gastric Adenocarcinoma | | |
| ACH-000737 | 3.3645724 | NCIH1385 | Lung Cancer | Lung | NSCLC |  | |
| ACH-000738 | 0.9855004 | GB1 | Brain Cancer | Central Nervous System | Glioma |  | |
| ACH-000739 | 4.5052558 | HEPG2 | Liver Cancer | Liver | Hepatocellular Carcinoma | | |
| ACH-000740 | 2.397803 | A253 | Head and Neck Cancer | Upper Aerodigestive | Upper Aerodigestive Squamous | | |
| ACH-000741 | 2.4409522 | UBLC1 | Bladder Cancer | Urinary Tract | Bladder Carcinoma | |  |
| ACH-000742 | 3.8914192 | DM3 | Fibroblast | Fibroblast | Fibroblast Lung | |  |
| ACH-000743 | 3.569248 | CORL95 | Lung Cancer | Lung | SCLC |  | |
| ACH-000744 | 3.3074285 | NCIH1623 | Lung Cancer | Lung | NSCLC |  | |
| ACH-000745 | 0.275007 | MOLP8 | Myeloma | Plasma Cell | Multiple Myeloma | |  |
| ACH-000746 | 1.6182387 | GSS | Gastric Cancer | Gastric | Gastric Adenocarcinoma | | |
| ACH-000747 | 4.0976108 | NCIH1703 | Lung Cancer | Lung | NSCLC |  | |
| ACH-000748 | 1.8479969 | SJSA1 | Bone Cancer | Bone | Osteosarcoma | |  |
| ACH-000749 | 2.8298496 | DMS273 | Lung Cancer | Lung | SCLC |  | |
| ACH-000750 | 0.8155754 | LOXIMVI | Skin Cancer | Skin | Melanoma |  | |
| ACH-000751 | 3.8298496 | OCIM1 | Leukemia | Blood | AML |  | |
| ACH-000752 | 2.6205864 | NCIH196 | Lung Cancer | Lung | SCLC |  | |
| ACH-000753 | 3.4087119 | JMSU1 | Bladder Cancer | Urinary Tract | Bladder Carcinoma | |  |
| ACH-000754 | 6.417515 | L428 | Lymphoma | Lymphocyte | Hodgkin Lymphoma | |  |
| ACH-000755 | 1.3673711 | HCC2218 | Breast Cancer | Breast | Breast Ductal Carcinoma | | |
| ACH-000756 | 3.704872 | GI1 | Brain Cancer | Central Nervous System | Glioma |  | |
| ACH-000757 | 2.077243 | A427 | Lung Cancer | Lung | NSCLC |  | |
| ACH-000758 | 2.6735564 | MKN74 | Gastric Cancer | Gastric | Gastric Adenocarcinoma | | |
| ACH-000759 | 3.9909549 | MDAMB175VII | Breast Cancer | Breast | Breast Ductal Carcinoma | | |
| ACH-000760 | 0.8559897 | LNZ308 | Brain Cancer | Central Nervous System | Glioma |  | |
| ACH-000761 | 3.1826923 | NUGC2 | Gastric Cancer | Gastric | Gastric Adenocarcinoma | | |
| ACH-000762 | 3.0755326 | YD38 | Head and Neck Cancer | Upper Aerodigestive | Upper Aerodigestive Squamous | | |
| ACH-000763 | 0.1634987 | MM1S | Myeloma | Plasma Cell | Multiple Myeloma | |  |
| ACH-000764 | 1.9068906 | SH10TC | Gastric Cancer | Gastric | Gastric Adenocarcinoma | | |
| ACH-000765 | 0.9183862 | WM983B | Skin Cancer | Skin | Melanoma |  | |
| ACH-000766 | 2.5160151 | NCIH1648 | Lung Cancer | Lung | NSCLC |  | |
| ACH-000767 | 2.2357271 | NCIH526 | Lung Cancer | Lung | SCLC |  | |
| ACH-000768 | 4.4039494 | MDAMB231 | Breast Cancer | Breast | Breast Carcinoma | |  |
| ACH-000769 | 0.6780719 | LK2 | Lung Cancer | Lung | NSCLC |  | |
| ACH-000770 | 3.2645364 | P31FUJ | Leukemia | Blood | AML |  | |
| ACH-000771 | 1.7004397 | BICR56 | Head and Neck Cancer | Upper Aerodigestive | Upper Aerodigestive Squamous | | |
| ACH-000772 | 3.5509007 | TE441T | Sarcoma | Soft Tissue | Rhabdomyosarcoma | |  |
| ACH-000773 | 5.6564964 | KIJK | Lymphoma | Lymphocyte | Non Hodgkin Lymphoma | |  |
| ACH-000774 | 2.0908534 | RERFLCAD2 | Lung Cancer | Lung | NSCLC |  | |
| ACH-000775 | 2.8559897 | NCIH727 | Lung Cancer | Lung | Lung Carcinoid | |  |
| ACH-000776 | 1.6229304 | ONS76 | Brain Cancer | Central Nervous System | Medulloblastoma | |  |
| ACH-000777 | 2.2078929 | KYSE30 | Esophageal Cancer | Esophagus | Esophagus Squamous | |  |
| ACH-000778 | 0.8073549 | HSC3 | Head and Neck Cancer | Upper Aerodigestive | Upper Aerodigestive Squamous | | |
| ACH-000779 | 1.5310695 | PC9 | Lung Cancer | Lung | NSCLC |  | |
| ACH-000780 | 2.6622055 | NCIH1105 | Lung Cancer | Lung | SCLC |  | |
| ACH-000781 | 4.6627752 | NCIH2023 | Lung Cancer | Lung | NSCLC |  | |
| ACH-000782 | 0.3673711 | SEM | Leukemia | Blood | ALL |  | |
| ACH-000783 | 4.6937657 | CAMA1 | Breast Cancer | Breast | Breast Carcinoma | |  |
| ACH-000784 | 1.0635029 | KYSE70 | Esophageal Cancer | Esophagus | Esophagus Squamous | |  |
| ACH-000785 | 3.2986583 | NCIH2126 | Lung Cancer | Lung | NSCLC |  | |
| ACH-000786 | 0.9335726 | DAUDI | Lymphoma | Lymphocyte | Non Hodgkin Lymphoma | |  |
| ACH-000787 | 3.7527486 | LXF289 | Lung Cancer | Lung | NSCLC |  | |
| ACH-000788 | 1.3504972 | A2058 | Skin Cancer | Skin | Melanoma |  | |
| ACH-000789 | 4.5090624 | NCIH810 | Lung Cancer | Lung | NSCLC |  | |
| ACH-000790 | 2.0071955 | SHP77 | Lung Cancer | Lung | SCLC |  | |
| ACH-000791 | 4.2094534 | RERFLCAD1 | Lung Cancer | Lung | NSCLC |  | |
| ACH-000792 | 4.9302642 | BFTC909 | Kidney Cancer | Kidney | Renal Cell Carcinoma | |  |
| ACH-000793 | 4.0426443 | KATOIII | Gastric Cancer | Gastric | Gastric Adenocarcinoma | | |
| ACH-000794 | 1.8599695 | BICR22 | Head and Neck Cancer | Upper Aerodigestive | Upper Aerodigestive Squamous | | |
| ACH-000796 | 1.704872 | MCAS | Ovarian Cancer | Ovary | Ovary Adenocarcinoma | |  |
| ACH-000797 | 4.0276849 | HLFA | Fibroblast | Fibroblast | Fibroblast Lung | |  |
| ACH-000798 | 1.827819 | CL40 | Colon/Colorectal Cancer | Colorectal | Colorectal Adenocarcinoma | | |
| ACH-000799 | 2.4982509 | HS695T | Skin Cancer | Skin | Melanoma |  | |
| ACH-000800 | 2.0600474 | NCIH446 | Lung Cancer | Lung | SCLC |  | |
| ACH-000801 | 2.6461627 | HS936T | Skin Cancer | Skin | Melanoma |  | |
| ACH-000802 | 0.8559897 | BFTC905 | Bladder Cancer | Urinary Tract | Bladder Carcinoma | |  |
| ACH-000803 | 2.0669502 | COLO668 | Lung Cancer | Lung | SCLC |  | |
| ACH-000804 | 0.4541759 | NB1 | Neuroblastoma | Peripheral Nervous System | Neuroblastoma | |  |
| ACH-000805 | 1.2868811 | COLO679 | Skin Cancer | Skin | Melanoma |  | |
| ACH-000806 | 6.3233701 | L540 | Lymphoma | Lymphocyte | Hodgkin Lymphoma | |  |
| ACH-000807 | 2.811471 | SNU738 | Brain Cancer | Central Nervous System | Glioma |  | |
| ACH-000808 | 4.2078929 | HUH28 | Bile Duct Cancer | Bile Duct | Cholangiocarcinoma | |  |
| ACH-000809 | 0.9335726 | KYSE410 | Esophageal Cancer | Esophagus | Esophagus Squamous | |  |
| ACH-000810 | 1.6135317 | SKMEL30 | Skin Cancer | Skin | Melanoma |  | |
| ACH-000811 | 2.2868811 | SKOV3 | Ovarian Cancer | Ovary | Ovary Adenocarcinoma | |  |
| ACH-000812 | 2.5033487 | COLO783 | Skin Cancer | Skin | Melanoma |  | |
| ACH-000813 | 5.4636878 | T3M10 | Lung Cancer | Lung | NSCLC |  | |
| ACH-000814 | 3.3117937 | HS939T | Skin Cancer | Skin | Melanoma |  | |
| ACH-000815 | 3.2942531 | KMH2 | Lymphoma | Lymphocyte | Hodgkin Lymphoma | |  |
| ACH-000816 | 1 | NCIH524 | Lung Cancer | Lung | SCLC |  | |
| ACH-000817 | 3.1093606 | RPMI8226 | Myeloma | Plasma Cell | Multiple Myeloma | |  |
| ACH-000818 | 4.4976124 | BT483 | Breast Cancer | Breast | Breast Ductal Carcinoma | | |
| ACH-000819 | 1.8196682 | LN18 | Brain Cancer | Central Nervous System | Glioma |  | |
| ACH-000820 | 4.4039494 | SW403 | Colon/Colorectal Cancer | Colorectal | Colorectal Adenocarcinoma | | |
| ACH-000821 | 2.8419731 | EJM | Myeloma | Plasma Cell | Multiple Myeloma | |  |
| ACH-000822 | 3.3462478 | SKMEL24 | Skin Cancer | Skin | Melanoma |  | |
| ACH-000823 | 0.5160151 | KYSE140 | Esophageal Cancer | Esophagus | Esophagus Squamous | |  |
| ACH-000824 | 1.8718436 | KYSE510 | Esophageal Cancer | Esophagus | Esophagus Squamous | |  |
| ACH-000825 | 4.0205911 | HOP92 | Lung Cancer | Lung | NSCLC |  | |
| ACH-000826 | 1.6182387 | CAL12T | Lung Cancer | Lung | NSCLC |  | |
| ACH-000827 | 1.7990873 | WM793 | Skin Cancer | Skin | Melanoma |  | |
| ACH-000828 | 3.2494453 | ZR7530 | Breast Cancer | Breast | Breast Ductal Carcinoma | | |
| ACH-000829 | 0.6507646 | HUNS1 | Myeloma | Plasma Cell | Multiple Myeloma | |  |
| ACH-000830 | 2.0669502 | NCIH1436 | Lung Cancer | Lung | SCLC |  | |
| ACH-000831 | 3.6610655 | HEC50B | Endometrial/Uterine Cancer | Uterus | Endometrial Adenocarcinoma | | |
| ACH-000832 | 2.7865964 | CAL27 | Head and Neck Cancer | Upper Aerodigestive | Upper Aerodigestive Squamous | | |
| ACH-000833 | 4.4442695 | RH30 | Sarcoma | Soft Tissue | Rhabdomyosarcoma | |  |
| ACH-000834 | 1.2265085 | UMUC1 | Bladder Cancer | Urinary Tract | Bladder Carcinoma | |  |
| ACH-000835 | 1.169925 | GCT | Sarcoma | Soft Tissue | Pleomorphic Sarcoma | |  |
| ACH-000836 | 0.6507646 | YD15 | Head and Neck Cancer | Upper Aerodigestive | Upper Aerodigestive Squamous | | |
| ACH-000837 | 1.0908534 | NCIH322 | Lung Cancer | Lung | NSCLC |  | |
| ACH-000838 | 0.3895668 | AMO1 | Myeloma | Plasma Cell | Multiple Myeloma | |  |
| ACH-000839 | 2.7114949 | SCABER | Bladder Cancer | Urinary Tract | Bladder Carcinoma | |  |
| ACH-000840 | 5.1659119 | HCC366 | Lung Cancer | Lung | NSCLC |  | |
| ACH-000841 | 5.3645724 | NCIH2087 | Lung Cancer | Lung | NSCLC |  | |
| ACH-000842 | 1.077243 | SW480 | Colon/Colorectal Cancer | Colorectal | Colorectal Adenocarcinoma | | |
| ACH-000843 | 2.0285692 | HARA | Lung Cancer | Lung | NSCLC |  | |
| ACH-000844 | 3.1375035 | DMS454 | Lung Cancer | Lung | SCLC |  | |
| ACH-000845 | 3.547203 | NCIH1373 | Lung Cancer | Lung | NSCLC |  | |
| ACH-000846 | 3.1226727 | FADU | Head and Neck Cancer | Upper Aerodigestive | Upper Aerodigestive Squamous | | |
| ACH-000847 | 2.2047668 | HGC27 | Gastric Cancer | Gastric | Gastric Adenocarcinoma | | |
| ACH-000848 | 0.7311832 | JHH7 | Liver Cancer | Liver | Hepatocellular Carcinoma | | |
| ACH-000849 | 2.9800253 | MDAMB468 | Breast Cancer | Breast | Breast Carcinoma | |  |
| ACH-000850 | 4.7897293 | HS698T | Fibroblast | Fibroblast | Fibroblast Colorectal | | |
| ACH-000851 | 4.6570683 | MORCPR | Lung Cancer | Lung | NSCLC |  | |
| ACH-000852 | 4.2433644 | NCIH1435 | Lung Cancer | Lung | NSCLC |  | |
| ACH-000853 | 1.5897635 | NCIH661 | Lung Cancer | Lung | NSCLC |  | |
| ACH-000854 | 0.3448285 | OCIMY5 | Myeloma | Plasma Cell | Multiple Myeloma | |  |
| ACH-000855 | 3.2630344 | KYSE150 | Esophageal Cancer | Esophagus | Esophagus Squamous | |  |
| ACH-000856 | 3.6088092 | CAL51 | Breast Cancer | Breast | Breast Carcinoma | |  |
| ACH-000857 | 3.5459684 | CAL851 | Breast Cancer | Breast | Breast Carcinoma | |  |
| ACH-000858 | 2.0461418 | KNS62 | Lung Cancer | Lung | NSCLC |  | |
| ACH-000859 | 4.0487593 | HCC1954 | Breast Cancer | Breast | Breast Ductal Carcinoma | | |
| ACH-000860 | 2.7506065 | NCIH358 | Lung Cancer | Lung | NSCLC |  | |
| ACH-000861 | 0.9560567 | HOP62 | Lung Cancer | Lung | NSCLC |  | |
| ACH-000862 | 1.0635029 | KMBC2 | Bladder Cancer | Urinary Tract | Bladder Carcinoma | |  |
| ACH-000863 | 1.4956952 | DBTRG05MG | Brain Cancer | Central Nervous System | Glioma |  | |
| ACH-000864 | 0.8479969 | COLO684 | Endometrial/Uterine Cancer | Uterus | Endometrial Adenocarcinoma | | |
| ACH-000865 | 0.8797058 | KYSE450 | Esophageal Cancer | Esophagus | Esophagus Squamous | |  |
| ACH-000866 | 3.9836777 | NCIH1048 | Lung Cancer | Lung | SCLC |  | |
| ACH-000867 | 4.3088851 | CHAGOK1 | Lung Cancer | Lung | NSCLC |  | |
| ACH-000868 | 1.3561438 | HCC1195 | Lung Cancer | Lung | NSCLC |  | |
| ACH-000869 | 4.0798048 | NCIH1568 | Lung Cancer | Lung | NSCLC |  | |
| ACH-000870 | 2.4032677 | NCIH1930 | Lung Cancer | Lung | SCLC |  | |
| ACH-000871 | 3.1259817 | NCIH510 | Lung Cancer | Lung | SCLC |  | |
| ACH-000872 | 3.7235586 | HCC515 | Lung Cancer | Lung | NSCLC |  | |
| ACH-000873 | 0.8318772 | KYSE270 | Esophageal Cancer | Esophagus | Esophagus Squamous | |  |
| ACH-000874 | 1.2868811 | RS411 | Leukemia | Blood | ALL |  | |
| ACH-000875 | 3.304511 | NCIH2347 | Lung Cancer | Lung | NSCLC |  | |
| ACH-000876 | 3.9164766 | MDAMB415 | Breast Cancer | Breast | Breast Carcinoma | |  |
| ACH-000877 | 0.704872 | EB1 | Lymphoma | Lymphocyte | Non Hodgkin Lymphoma | |  |
| ACH-000878 | 4.5084287 | HCC15 | Lung Cancer | Lung | NSCLC |  | |
| ACH-000879 | 3.1634987 | MFE296 | Endometrial/Uterine Cancer | Uterus | Endometrial Adenocarcinoma | | |
| ACH-000880 | 4.2265085 | AGS | Gastric Cancer | Gastric | Gastric Adenocarcinoma | | |
| ACH-000881 | 1.2448871 | MELJUSO | Skin Cancer | Skin | Melanoma |  | |
| ACH-000882 | 1.1243281 | IGR1 | Skin Cancer | Skin | Melanoma |  | |
| ACH-000883 | 2.5134907 | SW1783 | Brain Cancer | Central Nervous System | Glioma |  | |
| ACH-000884 | 4.0755326 | MDAMB435S | Skin Cancer | Skin | Melanoma |  | |
| ACH-000885 | 4.3631711 | TOV21G | Ovarian Cancer | Ovary | Ovary Adenocarcinoma | |  |
| ACH-000886 | 3.2172307 | NCIH2009 | Lung Cancer | Lung | NSCLC |  | |
| ACH-000887 | 3.8021932 | SF172 | Brain Cancer | Central Nervous System | Glioma |  | |
| ACH-000888 | 2.2898345 | NCIH1793 | Lung Cancer | Lung | NSCLC |  | |
| ACH-000889 | 0.8073549 | KMM1 | Myeloma | Plasma Cell | Multiple Myeloma | |  |
| ACH-000890 | 1.422233 | SW1271 | Lung Cancer | Lung | SCLC |  | |
| ACH-000891 | 5.3359262 | HCC1438 | Lung Cancer | Lung | NSCLC |  | |
| ACH-000892 | 4.1586602 | NCIH1563 | Lung Cancer | Lung | NSCLC |  | |
| ACH-000893 | 3.9354597 | NCIH1651 | Lung Cancer | Lung | NSCLC |  | |
| ACH-000894 | 4.2502037 | NCIH1869 | Lung Cancer | Lung | NSCLC |  | |
| ACH-000895 | 4.5843613 | CL34 | Colon/Colorectal Cancer | Colorectal | Colorectal Adenocarcinoma | | |
| ACH-000896 | 3.5372961 | 647V | Bladder Cancer | Urinary Tract | Bladder Carcinoma | |  |
| ACH-000897 | 3.9726927 | FTC238 | Thyroid Cancer | Thyroid | Thyroid Carcinoma | |  |
| ACH-000898 | 5.452859 | SNU719 | Gastric Cancer | Gastric | Gastric Adenocarcinoma | | |
| ACH-000899 | 3.5385382 | WM88 | Skin Cancer | Skin | Melanoma |  | |
| ACH-000900 | 3.44228 | NCIH23 | Lung Cancer | Lung | NSCLC |  | |
| ACH-000901 | 2.7782086 | HCC1359 | Lung Cancer | Lung | NSCLC |  | |
| ACH-000902 | 3.6287736 | CAL148 | Breast Cancer | Breast | Breast Ductal Carcinoma | | |
| ACH-000903 | 5.6185323 | FTC133 | Thyroid Cancer | Thyroid | Thyroid Carcinoma | |  |
| ACH-000904 | 4.0125687 | NCIH2106 | Lung Cancer | Lung | NSCLC |  | |
| ACH-000905 | 1.117695 | 5637 | Bladder Cancer | Urinary Tract | Bladder Carcinoma | |  |
| ACH-000906 | 1.8196682 | ES2 | Ovarian Cancer | Ovary | Ovary Adenocarcinoma | |  |
| ACH-000907 | 4.6937657 | SNU349 | Kidney Cancer | Kidney | Renal Cell Carcinoma | |  |
| ACH-000908 | 4.9954845 | SNU520 | Gastric Cancer | Gastric | Gastric Adenocarcinoma | | |
| ACH-000909 | 1.7092906 | JHUEM2 | Endometrial/Uterine Cancer | Uterus | Endometrial Adenocarcinoma | | |
| ACH-000910 | 4.560715 | MDAMB453 | Breast Cancer | Breast | Breast Carcinoma | |  |
| ACH-000911 | 3.9579146 | NUGC3 | Gastric Cancer | Gastric | Gastric Adenocarcinoma | | |
| ACH-000912 | 1.7180876 | NCIH2286 | Lung Cancer | Lung | SCLC |  | |
| ACH-000913 | 1.5753123 | ESS1 | Endometrial/Uterine Cancer | Uterus | Endometrial Stromal Sarcoma | | |
| ACH-000914 | 0.7655347 | HT | Lymphoma | Lymphocyte | Non Hodgkin Lymphoma | |  |
| ACH-000915 | 4.9909549 | IPC298 | Skin Cancer | Skin | Melanoma |  | |
| ACH-000916 | 4.8212 | NCIH1573 | Lung Cancer | Lung | NSCLC |  | |
| ACH-000917 | 2.4880008 | TE4 | Esophageal Cancer | Esophagus | Esophagus Squamous | |  |
| ACH-000918 | 0.2868811 | MOLT16 | Leukemia | Blood | ALL |  | |
| ACH-000919 | 5.1558302 | IM95 | Gastric Cancer | Gastric | Gastric Adenocarcinoma | | |
| ACH-000920 | 1.3161457 | CMLT1 | Leukemia | Blood | CML |  | |
| ACH-000921 | 2.6780719 | NCIH1339 | Lung Cancer | Lung | SCLC |  | |
| ACH-000922 | 0.4750849 | RCHACV | Leukemia | Blood | ALL |  | |
| ACH-000923 | 0.5558162 | BCP1 | Lymphoma | Lymphocyte | Non Hodgkin Lymphoma | |  |
| ACH-000924 | 2.8894735 | NCIH2172 | Lung Cancer | Lung | NSCLC |  | |
| ACH-000925 | 4.7996054 | DV90 | Lung Cancer | Lung | NSCLC |  | |
| ACH-000926 | 3.0806577 | HT55 | Colon/Colorectal Cancer | Colorectal | Colorectal Adenocarcinoma | | |
| ACH-000927 | 4.2667865 | BT474 | Breast Cancer | Breast | Breast Ductal Carcinoma | | |
| ACH-000928 | 0.8399596 | JHUEM1 | Endometrial/Uterine Cancer | Uterus | Endometrial Adenocarcinoma | | |
| ACH-000929 | 4.2410775 | NCIH2110 | Lung Cancer | Lung | NSCLC |  | |
| ACH-000930 | 1.5945485 | HCC1569 | Breast Cancer | Breast | Breast Carcinoma | |  |
| ACH-000931 | 2.5058909 | HMCB | Skin Cancer | Skin | Melanoma |  | |
| ACH-000932 | 0.6040713 | SNU1 | Gastric Cancer | Gastric | Gastric Adenocarcinoma | | |
| ACH-000933 | 5.396776 | SNU324 | Pancreatic Cancer | Pancreas | Exocrine |  | |
| ACH-000934 | 3.9231492 | MDAMB361 | Breast Cancer | Breast | Breast Carcinoma | |  |
| ACH-000935 | 3.3015876 | MDST8 | Colon/Colorectal Cancer | Colorectal | Colorectal Adenocarcinoma | | |
| ACH-000936 | 3.9726927 | EFO27 | Ovarian Cancer | Ovary | Ovary Adenocarcinoma | |  |
| ACH-000937 | 1 | PF382 | Leukemia | Blood | ALL |  | |
| ACH-000938 | 0.5260688 | NALM6 | Leukemia | Blood | ALL |  | |
| ACH-000939 | 2.0600474 | SKUT1 | Sarcoma | Soft Tissue | Leiomyosarcoma | |  |
| ACH-000940 | 2.9088129 | AN3CA | Endometrial/Uterine Cancer | Uterus | Endometrial Adenocarcinoma | | |
| ACH-000941 | 3.1763228 | HEC1B | Endometrial/Uterine Cancer | Uterus | Endometrial Adenocarcinoma | | |
| ACH-000942 | 0.8875253 | HPBALL | Leukemia | Blood | ALL |  | |
| ACH-000943 | 3.83289 | RKO | Colon/Colorectal Cancer | Colorectal | Colorectal Adenocarcinoma | | |
| ACH-000944 | 0.5360529 | NAMALWA | Lymphoma | Lymphocyte | Non Hodgkin Lymphoma | |  |
| ACH-000945 | 2.2479275 | NCIH650 | Lung Cancer | Lung | NSCLC |  | |
| ACH-000946 | 1.1953476 | HEC265 | Endometrial/Uterine Cancer | Uterus | Endometrial Adenocarcinoma | | |
| ACH-000947 | 5.4545049 | OVK18 | Ovarian Cancer | Ovary | Ovary Adenocarcinoma | |  |
| ACH-000948 | 3.9364024 | 2313287 | Gastric Cancer | Gastric | Gastric Adenocarcinoma | | |
| ACH-000949 | 4.3568481 | TGBC11TKB | Gastric Cancer | Gastric | Gastric Adenocarcinoma | | |
| ACH-000950 | 1.6229304 | LOVO | Colon/Colorectal Cancer | Colorectal | Colorectal Adenocarcinoma | | |
| ACH-000951 | 1.9818527 | NCIH2342 | Lung Cancer | Lung | NSCLC |  | |
| ACH-000952 | 0.5655972 | MDAPCA2B | Prostate Cancer | Prostate | Prostate Adenocarcinoma | | |
| ACH-000953 | 1.0840643 | SUPT1 | Leukemia | Blood | ALL |  | |
| ACH-000954 | 2.7376868 | HEC1A | Endometrial/Uterine Cancer | Uterus | Endometrial Adenocarcinoma | | |
| ACH-000955 | 0.9030383 | SNU407 | Colon/Colorectal Cancer | Colorectal | Colorectal Adenocarcinoma | | |
| ACH-000956 | 4.7980505 | 22RV1 | Prostate Cancer | Prostate | Prostate Adenocarcinoma | | |
| ACH-000957 | 4.4053117 | LS180 | Colon/Colorectal Cancer | Colorectal | Colorectal Adenocarcinoma | | |
| ACH-000958 | 5.8336491 | SW48 | Colon/Colorectal Cancer | Colorectal | Colorectal Adenocarcinoma | | |
| ACH-000959 | 4.7933757 | SNUC4 | Colon/Colorectal Cancer | Colorectal | Colorectal Adenocarcinoma | | |
| ACH-000960 | 1.0285692 | REH | Leukemia | Blood | ALL |  | |
| ACH-000961 | 2.0976108 | ISHIKAWAHERAKLIO02ER | Endometrial/Uterine Cancer | Uterus | Endometrial Adenocarcinoma | | |
| ACH-000962 | 3.9981955 | OC314 | Ovarian Cancer | Ovary | Ovary Adenocarcinoma | |  |
| ACH-000963 | 4.1135338 | CCK81 | Colon/Colorectal Cancer | Colorectal | Colorectal Adenocarcinoma | | |
| ACH-000964 | 0.3103401 | MOLT3 | Leukemia | Blood | ALL |  | |
| ACH-000965 | 1.6040713 | RL952 | Endometrial/Uterine Cancer | Uterus | Endometrial Adenosquamous | | |
| ACH-000966 | 3.0391384 | IGROV1 | Ovarian Cancer | Ovary | Ovary Adenocarcinoma | |  |
| ACH-000967 | 3.569248 | SNUC2A | Colon/Colorectal Cancer | Colorectal | Colorectal Adenocarcinoma | | |
| ACH-000968 | 1.8359241 | COLO792 | Skin Cancer | Skin | Melanoma |  | |
| ACH-000969 | 3.1763228 | KM12 | Colon/Colorectal Cancer | Colorectal | Colorectal Adenocarcinoma | | |
| ACH-000970 | 3.6005076 | SNUC5 | Colon/Colorectal Cancer | Colorectal | Colorectal Adenocarcinoma | | |
| ACH-000971 | 1.8237494 | HCT116 | Colon/Colorectal Cancer | Colorectal | Colorectal Adenocarcinoma | | |
| ACH-000972 | 3.582556 | HEC151 | Endometrial/Uterine Cancer | Uterus | Endometrial Adenocarcinoma | | |
| ACH-000973 | 1.6915342 | 639V | Bladder Cancer | Urinary Tract | Bladder Carcinoma | |  |
| ACH-000974 | 3.4032677 | SNGM | Endometrial/Uterine Cancer | Uterus | Endometrial Adenocarcinoma | | |
| ACH-000975 | 3.8349134 | HCC2450 | Lung Cancer | Lung | NSCLC |  | |
| ACH-000976 | 2.117695 | HUCCT1 | Bile Duct Cancer | Bile Duct | Cholangiocarcinoma | |  |
| ACH-000977 | 4.9236246 | LNCAPCLONEFGC | Prostate Cancer | Prostate | Prostate Adenocarcinoma | | |
| ACH-000978 | 2.1505597 | EN | Endometrial/Uterine Cancer | Uterus | Endometrial Adenocarcinoma | | |
| ACH-000980 | 2.8459918 | NCIH1155 | Lung Cancer | Lung | NSCLC |  | |
| ACH-000981 | 1.4750849 | DND41 | Leukemia | Blood | ALL |  | |
| ACH-000982 | 3.5385382 | GP2D | Colon/Colorectal Cancer | Colorectal | Colorectal Adenocarcinoma | | |
| ACH-000983 | 3.5459684 | KCL22 | Leukemia | Blood | CML |  | |
| ACH-000984 | 5.1317541 | HEC6 | Endometrial/Uterine Cancer | Uterus | Endometrial Adenocarcinoma | | |
| ACH-000985 | 2.7092906 | LS411N | Colon/Colorectal Cancer | Colorectal | Colorectal Adenocarcinoma | | |
| ACH-000986 | 4.4737869 | HT115 | Colon/Colorectal Cancer | Colorectal | Colorectal Adenocarcinoma | | |
| ACH-000987 | 5.0417686 | MEWO | Skin Cancer | Skin | Melanoma |  | |
| ACH-000988 | 3.6599246 | MFE319 | Endometrial/Uterine Cancer | Uterus | Endometrial Adenocarcinoma | | |
| ACH-000989 | 1.8718436 | SNU175 | Colon/Colorectal Cancer | Colorectal | Colorectal Adenocarcinoma | | |
| ACH-000990 | 1.9030383 | HEC108 | Endometrial/Uterine Cancer | Uterus | Endometrial Adenocarcinoma | | |
| ACH-000991 | 3.4515408 | SNU81 | Colon/Colorectal Cancer | Colorectal | Colorectal Adenocarcinoma | | |
| ACH-000993 | 2.9429836 | JHUEM7 | Endometrial/Uterine Cancer | Uterus | Endometrial Adenocarcinoma | | |
| ACH-000994 | 2.169925 | HEC59 | Endometrial/Uterine Cancer | Uterus | Endometrial Adenocarcinoma | | |
| ACH-000995 | 0.9335726 | JURKAT | Leukemia | Blood | ALL |  | |
| ACH-000996 | 2.0071955 | HEC251 | Endometrial/Uterine Cancer | Uterus | Endometrial Adenocarcinoma | | |
| ACH-000997 | 4.9527995 | HCT15 | Colon/Colorectal Cancer | Colorectal | Colorectal Adenocarcinoma | | |
| ACH-000998 | 4.7180876 | CW2 | Colon/Colorectal Cancer | Colorectal | Colorectal Adenocarcinoma | | |
| ACH-000999 | 4.0400157 | SNU1040 | Colon/Colorectal Cancer | Colorectal | Colorectal Adenocarcinoma | | |
| ACH-001001 | 0.2868811 | 143B | Bone Cancer | Bone | Osteosarcoma | |  |
| ACH-001016 | 3.5909612 | BECKER | Brain Cancer | Central Nervous System | Glioma |  | |
| ACH-001020 | 3.4302853 | BT16 | Rhabdoid | Soft Tissue | ATRT |  | |
| ACH-001022 | 1.2265085 | CBAGPN | Bone Cancer | Bone | Ewing Sarcoma | |  |
| ACH-001028 | 3.9088129 | CHLA06ATRT | Rhabdoid | Soft Tissue | ATRT |  | |
| ACH-001029 | 1 | CHLA10 | Bone Cancer | Bone | Ewing Sarcoma | |  |
| ACH-001030 | 0.7570232 | CHLA218 | Bone Cancer | Bone | Ewing Sarcoma | |  |
| ACH-001031 | 1.2265085 | CHLA266 | Rhabdoid | Soft Tissue | ATRT |  | |
| ACH-001032 | 0.4329594 | CHLA32 | Bone Cancer | Bone | Ewing Sarcoma | |  |
| ACH-001033 | 4.6553518 | CHLA57 | Bone Cancer | Bone | Ewing Sarcoma | |  |
| ACH-001034 | 0.5160151 | CHLA9 | Bone Cancer | Bone | Ewing Sarcoma | |  |
| ACH-001035 | 0.5655972 | CHLA99 | Bone Cancer | Bone | Ewing Sarcoma | |  |
| ACH-001036 | 0.9708537 | CMK115 | Leukemia | Blood | AML |  | |
| ACH-001038 | 0.2868811 | COGE352 | Bone Cancer | Bone | Ewing Sarcoma | |  |
| ACH-001041 | 1.0496308 | COLO699 | Lung Cancer | Lung | NSCLC |  | |
| ACH-001048 | 2.8933622 | COV504 | Ovarian Cancer | Ovary | Ovary Adenocarcinoma | |  |
| ACH-001050 | 2.9818527 | CW9019 | Sarcoma | Soft Tissue | Rhabdomyosarcoma | |  |
| ACH-001053 | 2.1634987 | D425 | Brain Cancer | Central Nervous System | Medulloblastoma | |  |
| ACH-001054 | 0.6040713 | D458 | Brain Cancer | Central Nervous System | Medulloblastoma | |  |
| ACH-001057 | 1.9818527 | DERL2 | Lymphoma | Lymphocyte | Lymphoma Unspecified | |  |
| ACH-001059 | 4.5141223 | DL | Rhabdoid | Soft Tissue | Malignant Rhabdoid Tumor | | |
| ACH-001060 | 0.3673711 | DL40 | Lymphoma | Lymphocyte | Lymphoma Unspecified | |  |
| ACH-001061 | 3.6287736 | DLD1 | Colon/Colorectal Cancer | Colorectal | Colorectal Adenocarcinoma | | |
| ACH-001067 | 3.3175935 | F5 | Brain Cancer | Central Nervous System | Meningioma |  | |
| ACH-001068 | 5.2712763 | FEPD | Lymphoma | Lymphocyte | Lymphoma Unspecified | |  |
| ACH-001075 | 3.5813512 | NCIH292 | Lung Cancer | Lung | NSCLC |  | |
| ACH-001086 | 3.275007 | HELA | Cervical Cancer | Cervix | Cervical Carcinoma | |  |
| ACH-001096 | 1.0285692 | JR | Sarcoma | Soft Tissue | Rhabdomyosarcoma | |  |
| ACH-001097 | 0.5459684 | KARPAS384 | Lymphoma | Lymphocyte | Lymphoma Unspecified | |  |
| ACH-001098 | 1.4854268 | KCIMOH1 | Pancreatic Cancer | Pancreas | Exocrine |  | |
| ACH-001099 | 5.4249221 | KD | Rhabdoid | Soft Tissue | Malignant Rhabdoid Tumor | | |
| ACH-001100 | 0.7570232 | KHYG | Lymphoma | Lymphocyte | Lymphoma Unspecified | |  |
| ACH-001106 | 0.641546 | KOPN8 | Leukemia | Blood | ALL |  | |
| ACH-001109 | 4.2125693 | KPMRTRY | Rhabdoid | Soft Tissue | Malignant Rhabdoid Tumor | | |
| ACH-001111 | 5.3034155 | L82 | Lymphoma | Lymphocyte | Lymphoma Unspecified | |  |
| ACH-001113 | 2.8816646 | LC1SQSF | Lung Cancer | Lung | NSCLC |  | |
| ACH-001119 | 4.4737869 | MAC2A | Lymphoma | Lymphocyte | Lymphoma Unspecified | |  |
| ACH-001128 | 2.2047668 | MON | Rhabdoid | Soft Tissue | Malignant Rhabdoid Tumor | | |
| ACH-001129 | 1.2509616 | MONOMAC1 | Leukemia | Blood | AML |  | |
| ACH-001132 | 0.7311832 | MTA | Lymphoma | Lymphocyte | Lymphoma Unspecified | |  |
| ACH-001134 | 2.2509616 | MYLA | Lymphoma | Lymphocyte | Lymphoma Unspecified | |  |
| ACH-001142 | 3.117695 | NHAHTDD | Engineered | Engineered Central Nervous System | | | |
| ACH-001145 | 4.2318932 | OC316 | Ovarian Cancer | Ovary | Ovary Adenocarcinoma | |  |
| ACH-001147 | 1.0565835 | OCILY12 | Lymphoma | Lymphocyte | Lymphoma Unspecified | |  |
| ACH-001148 | 0.7311832 | OCILY132 | Lymphoma | Lymphocyte | Lymphoma Unspecified | |  |
| ACH-001151 | 3.1618877 | OVCAR5 | Ovarian Cancer | Ovary | Ovary Adenocarcinoma | |  |
| ACH-001163 | 2.2720232 | CCLFPEDS0001T | Kidney Cancer | Kidney | Renal Cell Carcinoma | |  |
| ACH-001164 | 3.3059705 | CCLFPEDS0003T | Sarcoma | Soft Tissue | Undifferentiated Sarcoma | | |
| ACH-001172 | 2.9708537 | U251MGDM | Brain Cancer | Central Nervous System | Glioma |  | |
| ACH-001183 | 0.6322682 | RT11284 | Bladder Cancer | Urinary Tract | Bladder Carcinoma | |  |
| ACH-001184 | 1.4436067 | SCMCRM2 | Sarcoma | Soft Tissue | Rhabdomyosarcoma | |  |
| ACH-001188 | 0.4956952 | SHSY5Y | Neuroblastoma | Peripheral Nervous System | Neuroblastoma | |  |
| ACH-001190 | 0.6135317 | SKMEL2 | Skin Cancer | Skin | Melanoma |  | |
| ACH-001192 | 0.7311832 | SKNEP1 | Bone Cancer | Bone | Ewing Sarcoma | |  |
| ACH-001193 | 1.6229304 | SKPNDW | Bone Cancer | Bone | Ewing Sarcoma | |  |
| ACH-001194 | 4.3269687 | SKRC31 | Kidney Cancer | Kidney | Renal Cell Carcinoma | |  |
| ACH-001196 | 2.7570232 | SMSCTR | Sarcoma | Soft Tissue | Rhabdomyosarcoma | |  |
| ACH-001197 | 0.4005379 | SMZ1 | Lymphoma | Lymphocyte | Lymphoma Unspecified | |  |
| ACH-001200 | 5.1626934 | STM9101 | Rhabdoid | Soft Tissue | Malignant Rhabdoid Tumor | | |
| ACH-001201 | 0.6135317 | SUMB002 | Brain Cancer | Central Nervous System | Medulloblastoma | |  |
| ACH-001207 | 2.6803244 | TIG3TD | Fibroblast | Fibroblast | Fibroblast Lung | |  |
| ACH-001210 | 4.5185351 | TTC1240 | Rhabdoid | Soft Tissue | Malignant Rhabdoid Tumor | | |
| ACH-001211 | 1.9671686 | TTC549 | Rhabdoid | Soft Tissue | Malignant Rhabdoid Tumor | | |
| ACH-001228 | 0.3561438 | UPCISCC152 | Head and Neck Cancer | Upper Aerodigestive | Upper Aerodigestive Squamous | | |
| ACH-001229 | 2.4436067 | UPCISCC154 | Head and Neck Cancer | Upper Aerodigestive | Upper Aerodigestive Squamous | | |
| ACH-001232 | 3.3015876 | UW228 | Brain Cancer | Central Nervous System | Medulloblastoma | |  |
| ACH-001239 | 0.9855004 | WM2664 | Skin Cancer | Skin | Melanoma |  | |
| ACH-001270 | 2.7333543 | 127399 | Sarcoma | Soft Tissue | Synovial Sarcoma | |  |
| ACH-001274 | 2.6322682 | SW982 | Sarcoma | Soft Tissue | Synovial Sarcoma | |  |
| ACH-001275 | 2.2326608 | SYO1 | Sarcoma | Soft Tissue | Synovial Sarcoma | |  |
| ACH-001277 | 3.4502215 | YAMATO | Sarcoma | Soft Tissue | Synovial Sarcoma | |  |
| ACH-001278 | 1.9708537 | BIN67 | Ovarian Cancer | Ovary | SCCOHT |  | |
| ACH-001279 | 0.6322682 | SCCOHT1 | Ovarian Cancer | Ovary | SCCOHT |  | |
| ACH-001280 | 1.9373444 | SCS214 | Sarcoma | Soft Tissue | Synovial Sarcoma | |  |
| ACH-001283 | 0.1890338 | TC106 | Bone Cancer | Bone | Ewing Sarcoma | |  |
| ACH-001289 | 4.0617762 | COGAR359 | Rhabdoid | Soft Tissue | ATRT |  | |
| ACH-001295 | 0.6690268 | Y79 | Eye Cancer | Eye | Retinoblastoma | |  |
| ACH-001300 | 0.3448285 | CHLA15 | Neuroblastoma | Peripheral Nervous System | Neuroblastoma | |  |
| ACH-001301 | 0.6040713 | COGN278 | Neuroblastoma | Peripheral Nervous System | Neuroblastoma | |  |
| ACH-001302 | 0.9335726 | COGN305 | Neuroblastoma | Peripheral Nervous System | Neuroblastoma | |  |
| ACH-001303 | 0.4114262 | NB1643 | Neuroblastoma | Peripheral Nervous System | Neuroblastoma | |  |
| ACH-001306 | 3.587365 | 8305C | Thyroid Cancer | Thyroid | Thyroid Carcinoma | |  |
| ACH-001307 | 2.8797058 | 8505C | Thyroid Cancer | Thyroid | Thyroid Carcinoma | |  |
| ACH-001310 | 3.1618877 | HA1E | Engineered | Engineered Kidney | |  | |
| ACH-001318 | 3.4724878 | PLCPRF5 | Liver Cancer | Liver | Hepatocellular Carcinoma | | |
| ACH-001321 | 2.4436067 | TT | Thyroid Cancer | Thyroid | Thyroid Squamous | |  |
| ACH-001322 | 3.3334237 | CME1 | Sarcoma | Soft Tissue | Synovial Sarcoma | |  |
| ACH-001328 | 1.5360529 | A431 | Skin Cancer | Skin | Skin Squamous | |  |
| ACH-001329 | 2.5459684 | ANGMCSS | Brain Cancer | Central Nervous System | Glioma |  | |
| ACH-001332 | 1.8073549 | BICR78 | Head and Neck Cancer | Upper Aerodigestive | Upper Aerodigestive Squamous | | |
| ACH-001333 | 0.7398481 | C33A | Cervical Cancer | Cervix | Cervical Carcinoma | |  |
| ACH-001334 | 1.7612853 | C4I | Cervical Cancer | Cervix | Cervical Carcinoma | |  |
| ACH-001335 | 3.6622055 | C4II | Cervical Cancer | Cervix | Cervical Carcinoma | |  |
| ACH-001336 | 1.5210507 | CASKI | Cervical Cancer | Cervix | Cervical Squamous | |  |
| ACH-001338 | 0.2265085 | CHP134 | Neuroblastoma | Peripheral Nervous System | Neuroblastoma | |  |
| ACH-001339 | 0.9183862 | COLO794 | Skin Cancer | Skin | Melanoma |  | |
| ACH-001340 | 3.1521834 | COV413A | Ovarian Cancer | Ovary | Ovary Carcinoma | |  |
| ACH-001341 | 3.0891591 | DOTC24510 | Cervical Cancer | Cervix | Cervical Adenocarcinoma | | |
| ACH-001344 | 3.797013 | GIMEN | Neuroblastoma | Peripheral Nervous System | Neuroblastoma | |  |
| ACH-001345 | 2.9467309 | GP5D | Colon/Colorectal Cancer | Colorectal | Colorectal Adenocarcinoma | | |
| ACH-001346 | 2.1043367 | H103 | Head and Neck Cancer | Upper Aerodigestive | Upper Aerodigestive Squamous | | |
| ACH-001347 | 1.5410192 | H157 | Head and Neck Cancer | Upper Aerodigestive | Upper Aerodigestive Squamous | | |
| ACH-001353 | 2.4302853 | JOPACA1 | Pancreatic Cancer | Pancreas | Exocrine |  | |
| ACH-001354 | 0.6040713 | LAN2 | Neuroblastoma | Peripheral Nervous System | Neuroblastoma | |  |
| ACH-001356 | 2.3533233 | MB1 | Thyroid Cancer | Thyroid | Thyroid Carcinoma | |  |
| ACH-001360 | 3.5496692 | MS751 | Cervical Cancer | Cervix | Cervical Squamous | |  |
| ACH-001366 | 0.4750849 | NGP | Neuroblastoma | Peripheral Nervous System | Neuroblastoma | |  |
| ACH-001367 | 0.5459684 | NMB | Neuroblastoma | Peripheral Nervous System | Neuroblastoma | |  |
| ACH-001368 | 3.4737869 | OACM51 | Esophageal Cancer | Esophagus | Esophagus Adenocarcinoma | | |
| ACH-001369 | 2.8379432 | OCIC5X | Ovarian Cancer | Ovary | Ovary Adenocarcinoma | |  |
| ACH-001370 | 2.0531113 | OCIP5X | Ovarian Cancer | Ovary | Ovary Adenocarcinoma | |  |
| ACH-001373 | 1.4168397 | OV17R | Ovarian Cancer | Ovary | Ovary Adenocarcinoma | |  |
| ACH-001374 | 1.811471 | PA1 | Ovarian Cancer | Ovary | Mixed Germ Cell | |  |
| ACH-001375 | 2.5434959 | PACADD119 | Pancreatic Cancer | Pancreas | Exocrine |  | |
| ACH-001376 | 1.4059924 | PACADD135 | Pancreatic Cancer | Pancreas | Exocrine |  | |
| ACH-001377 | 3.3175935 | PACADD137 | Pancreatic Cancer | Pancreas | Exocrine |  | |
| ACH-001378 | 2.7246503 | PACADD159 | Pancreatic Cancer | Pancreas | Exocrine |  | |
| ACH-001379 | 3.4515408 | PACADD161 | Pancreatic Cancer | Pancreas | Exocrine |  | |
| ACH-001380 | 5.6836965 | PACADD165 | Pancreatic Cancer | Pancreas | Exocrine |  | |
| ACH-001382 | 3.2868811 | PACADD188 | Pancreatic Cancer | Pancreas | Exocrine |  | |
| ACH-001384 | 4.1301072 | RO82W1 | Thyroid Cancer | Thyroid | Thyroid Carcinoma | |  |
| ACH-001385 | 1.117695 | RPMI2650 | Head and Neck Cancer | Upper Aerodigestive | Upper Aerodigestive Squamous | | |
| ACH-001386 | 3.2172307 | SCLC22H | Lung Cancer | Lung | SCLC |  | |
| ACH-001388 | 0.1634987 | SUM102PT | Breast Cancer | Breast | Breast Carcinoma | |  |
| ACH-001389 | 3.6403896 | SUM1315MO2 | Breast Cancer | Breast | Breast Ductal Carcinoma | | |
| ACH-001390 | 0.4750849 | SUM149PT | Breast Cancer | Breast | Breast Ductal Carcinoma | | |
| ACH-001391 | 1.3617684 | SUM159PT | Breast Cancer | Breast | Breast Carcinoma | |  |
| ACH-001392 | 1.5360529 | SUM185PE | Breast Cancer | Breast | Breast Carcinoma | |  |
| ACH-001394 | 1.4594316 | SUM229PE | Breast Cancer | Breast | Breast Carcinoma | |  |
| ACH-001395 | 3.6644828 | SUM44PE | Breast Cancer | Breast | Breast Carcinoma | |  |
| ACH-001396 | 2.6182387 | SUM52PE | Breast Cancer | Breast | Breast Carcinoma | |  |
| ACH-001398 | 4.5223069 | SW156 | Kidney Cancer | Kidney | Renal Cell Carcinoma | |  |
| ACH-001399 | 2.4828483 | SW626 | Colon/Colorectal Cancer | Colorectal | Colorectal Adenocarcinoma | | |
| ACH-001400 | 0.7311832 | SW954 | Cervical Cancer | Cervix | Cervical Squamous | |  |
| ACH-001401 | 0.3334237 | SW13 | Adrenal Cancer | Adrenal Cortex | Adrenal Carcinoma | |  |
| ACH-001402 | 2.4594316 | SW756 | Cervical Cancer | Cervix | Cervical Squamous | |  |
| ACH-001403 | 0.7136958 | TO14 | Ovarian Cancer | Ovary | Ovary Adenocarcinoma | |  |
| ACH-001407 | 1.1309309 | UMUC13 | Bladder Cancer | Urinary Tract | Bladder Carcinoma | |  |
| ACH-001408 | 0.790772 | UMUC14 | Bladder Cancer | Urinary Tract | Bladder Carcinoma | |  |
| ACH-001409 | 1.3840498 | UMUC16 | Bladder Cancer | Urinary Tract | Bladder Carcinoma | |  |
| ACH-001410 | 3.0214797 | UMUC4 | Bladder Cancer | Urinary Tract | Bladder Carcinoma | |  |
| ACH-001411 | 1.6735564 | UMUC5 | Bladder Cancer | Urinary Tract | Bladder Carcinoma | |  |
| ACH-001412 | 2.2357271 | UMUC10 | Bladder Cancer | Urinary Tract | Bladder Carcinoma | |  |
| ACH-001413 | 2.3248106 | UMUC11 | Bladder Cancer | Urinary Tract | Bladder Carcinoma | |  |
| ACH-001414 | 0.2986583 | UMUC6 | Bladder Cancer | Urinary Tract | Bladder Carcinoma | |  |
| ACH-001415 | 3.770829 | UMUC7 | Bladder Cancer | Urinary Tract | Bladder Carcinoma | |  |
| ACH-001416 | 2.1890338 | UMUC9 | Bladder Cancer | Urinary Tract | Bladder Carcinoma | |  |
| ACH-001418 | 3.3798982 | UWB1289 | Ovarian Cancer | Ovary | Ovary Adenocarcinoma | |  |
| ACH-001419 | 3.9873209 | VP229 | Breast Cancer | Breast | Breast Ductal Carcinoma | | |
| ACH-001421 | 1.989139 | WERIRB1 | Eye Cancer | Eye | Retinoblastoma | |  |
| ACH-001422 | 2.22033 | WPE1NA22 | Prostate Cancer | Prostate | Prostate Adenocarcinoma | | |
| ACH-001430 | 0.4956952 | TC138 | Bone Cancer | Bone | Ewing Sarcoma | |  |
| ACH-001431 | 0.3673711 | TC205 | Bone Cancer | Bone | Ewing Sarcoma | |  |
| ACH-001433 | 2.8499993 | CCLFPEDS0008T | Sarcoma | Soft Tissue | Epithelioid Sarcoma | |  |
| ACH-001441 | 0.6507646 | 921 | Eye Cancer | Eye | Uveal Melanoma | |  |
| ACH-001442 | 1.5109619 | A388 | Skin Cancer | Epidermoid Carcinoma | Skin Squamous | |  |
| ACH-001443 | 2.3476657 | ASH3 | Thyroid Cancer | Thyroid | Thyroid Carcinoma | |  |
| ACH-001450 | 0.5558162 | BLUE1 | Lymphoma | Lymphocyte | Non Hodgkin Lymphoma | |  |
| ACH-001451 | 4.4107481 | BOKU | Cervical Cancer | Cervix | Cervical Squamous | |  |
| ACH-001453 | 1.5410192 | BPH1 | Prostate Cancer | Prostate | Prostate Hyperplasia | |  |
| ACH-001454 | 4.1432301 | C10 | Colon/Colorectal Cancer | Colorectal | Colorectal Adenocarcinoma | | |
| ACH-001456 | 3.2539893 | C125PM | Colon/Colorectal Cancer | Colorectal | Colorectal Adenocarcinoma | | |
| ACH-001458 | 2.2357271 | C75 | Colon/Colorectal Cancer | Colorectal | Colorectal Adenocarcinoma | | |
| ACH-001459 | 2.6735564 | C80 | Colon/Colorectal Cancer | Colorectal | Colorectal Adenocarcinoma | | |
| ACH-001460 | 2.9126499 | C84 | Colon/Colorectal Cancer | Colorectal | Colorectal Adenocarcinoma | | |
| ACH-001461 | 2.2357271 | C99 | Colon/Colorectal Cancer | Colorectal | Colorectal Adenocarcinoma | | |
| ACH-001484 | 0.3785116 | CI | Leukemia | Blood | Unspecified Leukemia | |  |
| ACH-001485 | 0.2016339 | CII | Leukemia | Blood | Unspecified Leukemia | |  |
| ACH-001494 | 1.9411063 | EGI1 | Bile Duct Cancer | Bile Duct | Cholangiocarcinoma | |  |
| ACH-001495 | 1.1890338 | EMTOKA | Endometrial/Uterine Cancer | Uterus | Uterine Carcinosarcoma | | |
| ACH-001496 | 2.4114262 | ESO26 | Esophageal Cancer | Esophagus | Esophagus Adenocarcinoma | | |
| ACH-001497 | 4.3875004 | ESO51 | Esophageal Cancer | Esophagus | Esophagus Adenocarcinoma | | |
| ACH-001498 | 0.3673711 | FARAGE | Lymphoma | Lymphocyte | Non Hodgkin Lymphoma | |  |
| ACH-001500 | 3.2387869 | FLO1 | Esophageal Cancer | Esophagus | Esophagus Adenocarcinoma | | |
| ACH-001509 | 0.5260688 | H357 | Head and Neck Cancer | Upper Aerodigestive | Upper Aerodigestive Squamous | | |
| ACH-001510 | 0.9259994 | H376 | Head and Neck Cancer | Upper Aerodigestive | Upper Aerodigestive Squamous | | |
| ACH-001511 | 2.4620523 | H413 | Head and Neck Cancer | Upper Aerodigestive | Upper Aerodigestive Squamous | | |
| ACH-001513 | 2.6780719 | HCA1 | Cervical Cancer | Cervix | Cervical Adenocarcinoma | | |
| ACH-001515 | 4.0045014 | HCS2 | Cervical Cancer | Cervix | Cervical Squamous | |  |
| ACH-001516 | 0.3673711 | HCSC1 | Cervical Cancer | Cervix | Cervical Carcinoma | |  |
| ACH-001517 | 1.0214797 | HEC1 | Endometrial/Uterine Cancer | Uterus | Endometrial Adenocarcinoma | | |
| ACH-001518 | 2.0426443 | HEC116 | Endometrial/Uterine Cancer | Uterus | Endometrial Adenocarcinoma | | |
| ACH-001519 | 3.2479275 | HEMCSS | Bone Cancer | Bone | Chondrosarcoma | |  |
| ACH-001520 | 0.2016339 | HG3 | Leukemia | Blood | Unspecified Leukemia | |  |
| ACH-001521 | 1.1440464 | HKA1 | Skin Cancer | Skin | Skin Squamous | |  |
| ACH-001522 | 1.803227 | HMY1 | Skin Cancer | Skin | Melanoma |  | |
| ACH-001523 | 1.803227 | HSC1 | Skin Cancer | Skin | Skin Squamous | |  |
| ACH-001524 | 1.7092906 | HSC5 | Skin Cancer | Skin | Skin Squamous | |  |
| ACH-001525 | 2.1043367 | HT3 | Cervical Cancer | Cervix | Cervical Carcinoma | |  |
| ACH-001526 | 0.2265085 | HUO9 | Bone Cancer | Bone | Osteosarcoma | |  |
| ACH-001528 | 4.2993912 | IHH4 | Thyroid Cancer | Thyroid | Thyroid Carcinoma | |  |
| ACH-001529 | 0.2265085 | JAR | Endometrial/Uterine Cancer | Uterus | Choriocarcinoma | |  |
| ACH-001530 | 0.2387869 | JEG3 | Endometrial/Uterine Cancer | Uterus | Choriocarcinoma | |  |
| ACH-001532 | 1.3448285 | JMURTK2 | Rhabdoid | Kidney | Malignant Rhabdoid Tumor | | |
| ACH-001533 | 1.7612853 | KARPAS1718 | Lymphoma | Lymphocyte | Non Hodgkin Lymphoma | |  |
| ACH-001536 | 1.4646683 | KKU100 | Bile Duct Cancer | Bile Duct | Cholangiocarcinoma | |  |
| ACH-001538 | 1.1570437 | KKU213 | Bile Duct Cancer | Bile Duct | Cholangiocarcinoma | |  |
| ACH-001539 | 0.1110313 | KML1 | Lymphoma | Lymphocyte | Non Hodgkin Lymphoma | |  |
| ACH-001540 | 1.2630344 | KMLS1 | Liposarcoma | Soft Tissue | Liposarcoma | |  |
| ACH-001541 | 0.3785116 | KMS28PE | Myeloma | Plasma Cell | Multiple Myeloma | |  |
| ACH-001542 | 1.5704629 | KON | Head and Neck Cancer | Upper Aerodigestive | Upper Aerodigestive Squamous | | |
| ACH-001543 | 1.9855004 | KOSC2 | Head and Neck Cancer | Upper Aerodigestive | Upper Aerodigestive Squamous | | |
| ACH-001547 | 4.9859558 | LO68 | Lung Cancer | Lung | Mesothelioma | |  |
| ACH-001548 | 0.3785116 | LS | Neuroblastoma | Peripheral Nervous System | Neuroblastoma | |  |
| ACH-001549 | 2.5058909 | LU135 | Lung Cancer | Lung | SCLC |  | |
| ACH-001550 | 3.0285692 | MCC13 | Skin Cancer | Skin | Merkel Cell Carcinoma | | |
| ACH-001551 | 2.0840643 | MCC142 | Skin Cancer | Skin | Merkel Cell Carcinoma | | |
| ACH-001552 | 2.3504972 | MCC26 | Skin Cancer | Skin | Merkel Cell Carcinoma | | |
| ACH-001554 | 1.1890338 | MEL202 | Eye Cancer | Eye | Uveal Melanoma | |  |
| ACH-001555 | 4.4607426 | MERO14 | Lung Cancer | Lung | Mesothelioma | |  |
| ACH-001556 | 0.6959938 | MERO25 | Lung Cancer | Lung | Mesothelioma | |  |
| ACH-001557 | 2.077243 | MERO41 | Lung Cancer | Lung | Mesothelioma | |  |
| ACH-001558 | 2.9981955 | MERO48A | Lung Cancer | Lung | Mesothelioma | |  |
| ACH-001559 | 1.9259994 | MERO82 | Lung Cancer | Lung | Mesothelioma | |  |
| ACH-001560 | 2.8479969 | MERO83 | Lung Cancer | Lung | Mesothelioma | |  |
| ACH-001561 | 3.8227301 | MERO84 | Lung Cancer | Lung | Mesothelioma | |  |
| ACH-001562 | 4.3861212 | MERO95 | Lung Cancer | Lung | Mesothelioma | |  |
| ACH-001563 | 1.7180876 | MM127 | Skin Cancer | Skin | Melanoma |  | |
| ACH-001566 | 4.2334279 | MM370 | Skin Cancer | Skin | Melanoma |  | |
| ACH-001567 | 0.4646683 | MM383 | Skin Cancer | Skin | Melanoma |  | |
| ACH-001568 | 2.2047668 | MM386 | Skin Cancer | Skin | Melanoma |  | |
| ACH-001569 | 2.9411063 | MM415 | Skin Cancer | Skin | Melanoma |  | |
| ACH-001570 | 2.8237494 | MM426 | Skin Cancer | Skin | Melanoma |  | |
| ACH-001573 | 0.790772 | MOLM1 | Leukemia | Blood | CML |  | |
| ACH-001574 | 0.9259994 | MOLM14 | Leukemia | Blood | AML |  | |
| ACH-001577 | 1.8318772 | MUTZ8 | Leukemia | Blood | AML |  | |
| ACH-001578 | 0.8479969 | NCCIT | Embryonal Cancer | Embryo | Embryo Carcinoma | |  |
| ACH-001603 | 0.3103401 | NH12 | Neuroblastoma | Peripheral Nervous System | Neuroblastoma | |  |
| ACH-001605 | 2.8196682 | NO10 | Brain Cancer | Central Nervous System | Glioma |  | |
| ACH-001607 | 3.8884997 | NOZ | Gallbladder Cancer | Bile Duct | Gallbladder Adenocarcinoma | | |
| ACH-001608 | 2.8339021 | NP2 | Brain Cancer | Central Nervous System | Glioma |  | |
| ACH-001609 | 2.0250288 | NP3 | Brain Cancer | Central Nervous System | Glioma |  | |
| ACH-001610 | 2.8619554 | NP5 | Brain Cancer | Central Nervous System | Glioma |  | |
| ACH-001611 | 1.6553518 | NP8 | Brain Cancer | Central Nervous System | Glioma |  | |
| ACH-001613 | 1.7311832 | OCIAML4 | Leukemia | Blood | AML |  | |
| ACH-001616 | 0.4854268 | OCILY18 | Lymphoma | Lymphocyte | Non Hodgkin Lymphoma | |  |
| ACH-001617 | 0.6959938 | OCILY7 | Lymphoma | Lymphocyte | Non Hodgkin Lymphoma | |  |
| ACH-001618 | 0.4956952 | OCIM2 | Leukemia | Blood | AML |  | |
| ACH-001619 | 3.6005076 | OCUG1 | Gallbladder Cancer | Bile Duct | Gallbladder Adenocarcinoma | | |
| ACH-001622 | 2.2539893 | ONDA7 | Brain Cancer | Central Nervous System | Glioma |  | |
| ACH-001623 | 2.1043367 | ONDA8 | Brain Cancer | Central Nervous System | Glioma |  | |
| ACH-001624 | 3.1076879 | ONDA9 | Brain Cancer | Central Nervous System | Glioma |  | |
| ACH-001625 | 2.0461418 | OSC19 | Head and Neck Cancer | Upper Aerodigestive | Upper Aerodigestive Squamous | | |
| ACH-001626 | 1.1375035 | OSC20 | Head and Neck Cancer | Upper Aerodigestive | Upper Aerodigestive Squamous | | |
| ACH-001627 | 1.9221978 | P4E6 | Prostate Cancer | Prostate | Prostate Adenocarcinoma | | |
| ACH-001628 | 2.4249221 | PEA1 | Ovarian Cancer | Ovary | Ovary Adenocarcinoma | |  |
| ACH-001630 | 4.0883112 | PEO1 | Ovarian Cancer | Ovary | Ovary Adenocarcinoma | |  |
| ACH-001632 | 0.7655347 | PEO4 | Ovarian Cancer | Ovary | Ovary Adenocarcinoma | |  |
| ACH-001634 | 0.641546 | PGA1 | Leukemia | Blood | CLL |  | |
| ACH-001636 | 0.8318772 | RAMOS | Lymphoma | Lymphocyte | Non Hodgkin Lymphoma | |  |
| ACH-001638 | 0.4854268 | RCK8 | Lymphoma | Lymphocyte | Lymphoma Unspecified | |  |
| ACH-001641 | 2.4724878 | SAT | Head and Neck Cancer | Upper Aerodigestive | Upper Aerodigestive Squamous | | |
| ACH-001642 | 4.6865005 | SCC3 | Lymphoma | Lymphocyte | Non Hodgkin Lymphoma | |  |
| ACH-001645 | 1.1440464 | SEKI | Skin Cancer | Skin | Melanoma |  | |
| ACH-001647 | 0.6322682 | SHI1 | Leukemia | Blood | AML |  | |
| ACH-001648 | 2.9202933 | SHMAC4 | Prostate Cancer | Prostate | Prostate Adenocarcinoma | | |
| ACH-001649 | 2.7441611 | SHMAC5 | Prostate Cancer | Prostate | Prostate Adenocarcinoma | | |
| ACH-001650 | 3.7441611 | SISO | Cervical Cancer | Cervix | Cervical Adenocarcinoma | | |
| ACH-001651 | 3.5558162 | SKGI | Endometrial/Uterine Cancer | Uterus | Endometrial Squamous | |  |
| ACH-001652 | 1.6182387 | SKGII | Endometrial/Uterine Cancer | Uterus | Endometrial Squamous | |  |
| ACH-001653 | 2.0285692 | SKGT2 | Gastric Cancer | Gastric | Gastric Adenocarcinoma | | |
| ACH-001654 | 2.4776773 | SKGT4 | Esophageal Cancer | Esophagus | Esophagus Adenocarcinoma | | |
| ACH-001655 | 2.0143553 | SKN | Endometrial/Uterine Cancer | Uterus | Endometrial Squamous | |  |
| ACH-001656 | 1.22033 | SKNO1 | Leukemia | Blood | AML |  | |
| ACH-001664 | 4.0143553 | SNU638 | Gastric Cancer | Gastric | Gastric Adenocarcinoma | | |
| ACH-001668 | 0.8559897 | SUSA | Teratoma | Embryo | Teratoma |  | |
| ACH-001669 | 1.5310695 | TANOUE | Leukemia | Blood | ALL |  | |
| ACH-001670 | 0.5160151 | TASK1 | Brain Cancer | Peripheral Nervous System | PNET |  | |
| ACH-001673 | 4.1268077 | TFK1 | Bile Duct Cancer | Bile Duct | Cholangiocarcinoma | |  |
| ACH-001674 | 0.4329594 | TGW | Neuroblastoma | Peripheral Nervous System | Neuroblastoma | |  |
| ACH-001677 | 0.5753123 | U2904 | Lymphoma | Lymphocyte | Lymphoma Unspecified | |  |
| ACH-001685 | 3.3964335 | UHO1 | Lymphoma | Lymphocyte | Hodgkin Lymphoma | |  |
| ACH-001687 | 4.6322682 | UMRC3 | Kidney Cancer | Kidney |  | | |
| ACH-001688 | 4.0036022 | UMRC7 | Kidney Cancer | Kidney |  | | |
| ACH-001690 | 1.722466 | UPCISCC026 | Head and Neck Cancer | Upper Aerodigestive | Upper Aerodigestive Squamous | | |
| ACH-001692 | 2.114367 | UPCISCC040 | Head and Neck Cancer | Upper Aerodigestive | Upper Aerodigestive Squamous | | |
| ACH-001694 | 2.5655972 | UPCISCC074 | Head and Neck Cancer | Upper Aerodigestive | Upper Aerodigestive Squamous | | |
| ACH-001696 | 2.2927817 | UPCISCC111 | Head and Neck Cancer | Upper Aerodigestive | Upper Aerodigestive Squamous | | |
| ACH-001698 | 0.6780719 | UPCISCC116 | Head and Neck Cancer | Upper Aerodigestive | Upper Aerodigestive Squamous | | |
| ACH-001699 | 1.5897635 | UPCISCC131 | Head and Neck Cancer | Upper Aerodigestive | Upper Aerodigestive Squamous | | |
| ACH-001701 | 1.6599246 | UPCISCC200 | Head and Neck Cancer | Upper Aerodigestive | Upper Aerodigestive Squamous | | |
| ACH-001702 | 3.9909549 | VAESBJ | Sarcoma | Soft Tissue | Epithelioid Sarcoma | |  |
| ACH-001703 | 1.4382929 | VAL | Lymphoma | Lymphocyte | Non Hodgkin Lymphoma | |  |
| ACH-001707 | 0.5360529 | WAOSEL | Leukemia | Blood | CLL |  | |
| ACH-001709 | 1.0071955 | WSUNHL | Lymphoma | Lymphocyte | Lymphoma Unspecified | |  |
| ACH-001711 | 2.2418402 | PFSK1 | Brain Cancer | Central Nervous System | PNET |  | |
| ACH-001712 | 3.9818527 | HS860T | Bone Cancer | Bone | Osteosarcoma | |  |
| ACH-001715 | 1.9745293 | CAL72 | Bone Cancer | Bone | Osteosarcoma | |  |
| ACH-001716 | 0.9107327 | GOTO | Neuroblastoma | Peripheral Nervous System | Neuroblastoma | |  |
| ACH-001719 | 2.1243281 | OCIC4P | Ovarian Cancer | Ovary | Ovary Adenocarcinoma | |  |
| ACH-001735 | 0.1505597 | SEMK2 | Leukemia | Blood | ALL |  | |
| ACH-001736 | 0.0703893 | HB1119 | Leukemia | Blood | ALL |  | |
| ACH-001737 | 0.2265085 | HSB2 | Leukemia | Blood | ALL |  | |
| ACH-001740 | 1.9030383 | RH28 | Sarcoma | Soft Tissue | Rhabdomyosarcoma | |  |
| ACH-001743 | 2.6825733 | RC2 | Sarcoma | Soft Tissue | Rhabdomyosarcoma | |  |
| ACH-001745 | 1.3334237 | RHJT | Sarcoma | Soft Tissue | Rhabdomyosarcoma | |  |
| ACH-001750 | 1.4594316 | TTC442 | Sarcoma | Soft Tissue | Rhabdomyosarcoma | |  |
| ACH-001751 | 1.9107327 | RH36 | Sarcoma | Soft Tissue | Rhabdomyosarcoma | |  |
| ACH-001765 | 0.5849625 | RH4 | Sarcoma | Soft Tissue | Rhabdomyosarcoma | |  |
| ACH-001786 | 4.7787342 | SNU1544 | Colon/Colorectal Cancer | Colorectal | Colorectal Adenocarcinoma | | |
| ACH-001791 | 5.2292034 | LPS6 | Liposarcoma | Soft Tissue | Liposarcoma | |  |
| ACH-001793 | 1.9634741 | LPS27 | Liposarcoma | Soft Tissue | Liposarcoma | |  |
| ACH-001794 | 3.1921942 | 93T449 | Liposarcoma | Soft Tissue | Liposarcoma | |  |
| ACH-001795 | 1.4005379 | 94T778 | Liposarcoma | Soft Tissue | Liposarcoma | |  |
| ACH-001796 | 3.0840643 | 95T1000 | Liposarcoma | Soft Tissue | Liposarcoma | |  |
| ACH-001799 | 0.6322682 | LPS141 | Liposarcoma | Soft Tissue | Liposarcoma | |  |
| ACH-001802 | 5.519479 | LPS853 | Liposarcoma | Soft Tissue | Liposarcoma | |  |
| ACH-001804 | 4.1301072 | LPS510 | Liposarcoma | Soft Tissue | Liposarcoma | |  |
| ACH-001807 | 5.5046204 | LPS067 | Liposarcoma | Soft Tissue | Liposarcoma | |  |
| ACH-001814 | 4.1984942 | OS252 | Bone Cancer | Bone | Osteosarcoma | |  |
| ACH-001818 | 4.1489341 | C396 | Bone Cancer | Bone | Osteosarcoma | |  |
| ACH-001819 | 2.9560567 | MFM223 | Breast Cancer | Breast | Breast Ductal Carcinoma | | |
| ACH-001820 | 1.0143553 | COLO824 | Breast Cancer | Breast |  | | |
| ACH-001834 | 4.551516 | ICC10 | Bile Duct Cancer | Bile Duct | Cholangiocarcinoma | |  |
| ACH-001835 | 4.1085245 | ICC106 | Bile Duct Cancer | Bile Duct | Cholangiocarcinoma | |  |
| ACH-001836 | 4.5813512 | ICC108 | Bile Duct Cancer | Bile Duct | Cholangiocarcinoma | |  |
| ACH-001838 | 2.4302853 | ICC12 | Bile Duct Cancer | Bile Duct | Cholangiocarcinoma | |  |
| ACH-001839 | 6.6736977 | ICC137 | Bile Duct Cancer | Bile Duct | Cholangiocarcinoma | |  |
| ACH-001841 | 1.9708537 | ICC15 | Bile Duct Cancer | Bile Duct | Cholangiocarcinoma | |  |
| ACH-001842 | 1.5945485 | ICC2 | Bile Duct Cancer | Bile Duct | Cholangiocarcinoma | |  |
| ACH-001843 | 1.2986583 | ICC3 | Bile Duct Cancer | Bile Duct | Cholangiocarcinoma | |  |
| ACH-001844 | 5.4022447 | ICC4 | Bile Duct Cancer | Bile Duct | Cholangiocarcinoma | |  |
| ACH-001845 | 5.4689091 | ICC5 | Bile Duct Cancer | Bile Duct | Cholangiocarcinoma | |  |
| ACH-001846 | 4.9054472 | ICC6 | Bile Duct Cancer | Bile Duct | Cholangiocarcinoma | |  |
| ACH-001848 | 2.9259994 | ICC8 | Bile Duct Cancer | Bile Duct | Cholangiocarcinoma | |  |
| ACH-001849 | 2.7591558 | ICC9 | Bile Duct Cancer | Bile Duct | Cholangiocarcinoma | |  |
| ACH-001850 | 2.6135317 | G415 | Gallbladder Cancer | Bile Duct | Gallbladder Adenocarcinoma | | |
| ACH-001852 | 1.811471 | HKGZCC | Bile Duct Cancer | Bile Duct | Cholangiocarcinoma | |  |
| ACH-001853 | 3.5545889 | KMCH1 | Bile Duct Cancer | Bile Duct | Cholangiocarcinoma | |  |
| ACH-001856 | 4.9207697 | RBE | Bile Duct Cancer | Bile Duct | Cholangiocarcinoma | |  |
| ACH-001857 | 1.2387869 | SG231 | Bile Duct Cancer | Bile Duct | Cholangiocarcinoma | |  |
| ACH-001858 | 2.7506065 | SSP25 | Bile Duct Cancer | Bile Duct | Cholangiocarcinoma | |  |
| ACH-001861 | 3.4672795 | TGBC1TKB | Gallbladder Cancer | Bile Duct | Gallbladder Adenocarcinoma | | |
| ACH-001862 | 4.7724136 | TGBC52TKB | Bile Duct Cancer | Bile Duct | Cholangiocarcinoma | |  |
| ACH-001863 | 3.704872 | TKKK | Bile Duct Cancer | Bile Duct | Cholangiocarcinoma | |  |
| ACH-001864 | 0.8479969 | YSCCC | Bile Duct Cancer | Bile Duct | Cholangiocarcinoma | |  |
| ACH-001959 | 0.6040713 | CCLP1 | Bile Duct Cancer | Bile Duct | Cholangiocarcinoma | |  |
| ACH-001960 | 2.6135317 | CCSW1 | Bile Duct Cancer | Bile Duct | Cholangiocarcinoma | |  |
| ACH-001961 | 4.4409522 | GB2 | Gallbladder Cancer | Bile Duct | Gallbladder Adenocarcinoma | | |
| ACH-001970 | 2.3448285 | MM253 | Skin Cancer | Skin | Melanoma |  | |
| ACH-001973 | 0.6780719 | MM485 | Skin Cancer | Skin | Melanoma |  | |
| ACH-001977 | 2.9818527 | NO36 | Lung Cancer | Lung | Mesothelioma | |  |
| ACH-001982 | 4.1235007 | NZM3 | Skin Cancer | Skin | Melanoma |  | |
| ACH-001991 | 3.1127001 | NZOV9 | Ovarian Cancer | Ovary | Ovary Adenocarcinoma | |  |
| ACH-001992 | 2.9616233 | ONE58 | Lung Cancer | Lung | Mesothelioma | |  |
| ACH-001993 | 0.4114262 | NALM16 | Leukemia | Blood | ALL |  | |
| ACH-001997 | 4.1068508 | ECC2 | Bile Duct Cancer | Bile Duct | Cholangiocarcinoma | |  |
| ACH-001999 | 2.3419857 | 9505BIK | Pancreatic Cancer | Pancreas | Exocrine |  | |
| ACH-002001 | 1.0908534 | A375SKINCJ1 | Skin Cancer | Skin | Melanoma |  | |
| ACH-002002 | 2.1243281 | A375SKINCJ2 | Skin Cancer | Skin | Melanoma |  | |
| ACH-002003 | 0.5160151 | A375SKINCJ3 | Skin Cancer | Skin | Melanoma |  | |
| ACH-002004 | 2.7591558 | UACC62SKINCJ1 | Skin Cancer | Skin | Melanoma |  | |
| ACH-002005 | 2.2720232 | SKMEL19 | Skin Cancer | Skin | Melanoma |  | |
| ACH-002011 | 1.790772 | MP46 | Eye Cancer | Eye | Uveal Melanoma | |  |
| ACH-002014 | 2.0036022 | MEL270 | Eye Cancer | Eye | Uveal Melanoma | |  |
| ACH-002015 | 3.6712934 | MEL285 | Eye Cancer | Eye | Uveal Melanoma | |  |
| ACH-002016 | 3.7897293 | MEL290 | Eye Cancer | Eye | Uveal Melanoma | |  |
| ACH-002017 | 3.129283 | OMM1 | Eye Cancer | Eye | Uveal Melanoma | |  |
| ACH-002018 | 0.8559897 | OMM25 | Eye Cancer | Eye | Uveal Melanoma | |  |
| ACH-002019 | 3.0992952 | HOKUG | Cervical Cancer | Cervix | Glassy Cell Carcinoma | | |
| ACH-002021 | 0.4114262 | T3M3 | Endometrial/Uterine Cancer | Uterus | Choriocarcinoma | |  |
| ACH-002023 | 3.7876414 | TGBC18TKB | Colon/Colorectal Cancer | Colorectal | Colorectal Adenocarcinoma | | |
| ACH-002024 | 3.9745293 | ECC4 | Colon/Colorectal Cancer | Colorectal | Colorectal Adenocarcinoma | | |
| ACH-002025 | 2.5033487 | TT1TKB | Colon/Colorectal Cancer | Colorectal | Colorectal Adenocarcinoma | | |
| ACH-002026 | 2.5582676 | HHUA | Endometrial/Uterine Cancer | Uterus | Endometrial Adenocarcinoma | | |
| ACH-002027 | 2.0738202 | HOUAI | Endometrial/Uterine Cancer | Uterus | Endometrial Adenocarcinoma | | |
| ACH-002029 | 0.7739963 | SAS | Head and Neck Cancer | Upper Aerodigestive | Upper Aerodigestive Squamous | | |
| ACH-002038 | 3.7387678 | HSKTC | Ovarian Cancer | Ovary | Krukenberg Tumor | |  |
| ACH-002039 | 0.7398481 | PK8 | Pancreatic Cancer | Pancreas | Exocrine |  | |
| ACH-002041 | 1.8439838 | HOTHC | Thyroid Cancer | Thyroid | Thyroid Carcinoma | |  |
| ACH-002042 | 1.4956952 | T3M5 | Thyroid Cancer | Thyroid | Thyroid Squamous | |  |
| ACH-002044 | 0.3219281 | HSQ89 | Head and Neck Cancer | Upper Aerodigestive | Upper Aerodigestive Squamous | | |
| ACH-002045 | 0.275007 | HO1U1 | Head and Neck Cancer | Upper Aerodigestive | Upper Aerodigestive Squamous | | |
| ACH-002046 | 1.3840498 | HTMMT | Endometrial/Uterine Cancer | Uterus | MMMT |  | |
| ACH-002048 | 0.9107327 | RMSYM | Sarcoma | Soft Tissue | Rhabdomyosarcoma | |  |
| ACH-002055 | 0.1890338 | TL1 | Lymphoma | Lymphocyte | Non Hodgkin Lymphoma | |  |
| ACH-002059 | 0.3785116 | P30OHK | Leukemia | Blood | ALL |  | |
| ACH-002061 | 4.077243 | P2URK562 | Leukemia | Blood | CML |  | |
| ACH-002062 | 1.3895668 | SLVL | Lymphoma | Lymphocyte | Lymphoma Unspecified | |  |
| ACH-002065 | 2.4802651 | HSPSS | Sarcoma | Central Nervous System | MPNST |  | |
| ACH-002066 | 1.422233 | HSSCH2 | Sarcoma | Central Nervous System | MPNST |  | |
| ACH-002067 | 1.4594316 | NOS1 | Bone Cancer | Bone | Osteosarcoma | |  |
| ACH-002069 | 0.5945485 | HSOS1 | Bone Cancer | Bone | Osteosarcoma | |  |
| ACH-002080 | 0.1763228 | TN2 | Neuroblastoma | Peripheral Nervous System | Neuroblastoma | |  |
| ACH-002084 | 3.523562 | MMAC | Skin Cancer | Skin | Melanoma |  | |
| ACH-002446 | 2.8237494 | CCLFUPGI0005T | Gastric Cancer | Gastric | Gastric Adenocarcinoma | | |
| ACH-002458 | 2.4982509 | HT144SKINFV1 | Skin Cancer | Skin | Melanoma |  | |
| ACH-002459 | 3.0806577 | HT144SKINFV3 | Skin Cancer | Skin | Melanoma |  | |
| ACH-002460 | 2.6438562 | HT144SKINFV2 | Skin Cancer | Skin | Melanoma |  | |
| ACH-002461 | 2.5801455 | RVH421SKINFV1 | Skin Cancer | Skin | Melanoma |  | |
| ACH-002462 | 3.295723 | RPE1SS48 | Engineered | Engineered |  | | |
| ACH-002463 | 2.1731274 | RPE1SS77 | Engineered | Engineered |  | | |
| ACH-002464 | 3.1602748 | RPE1SS6 | Engineered | Engineered |  | | |
| ACH-002465 | 2.7865964 | RPE1SS119 | Engineered | Engineered |  | | |
| ACH-002466 | 1.9818527 | RPE1SS111 | Engineered | Engineered |  | | |
| ACH-002467 | 2.0071955 | RPE1SS51 | Engineered | Engineered |  | | |
| ACH-002475 | 0.8237494 | HAP1 | Engineered | Engineered Blood | CML |  | |
| ACH-002508 | 1.1440464 | WM3211 | Skin Cancer | Skin | Melanoma |  | |
| ACH-002509 | 3.4073528 | WM4235 | Skin Cancer | Skin | Melanoma |  | |
| ACH-002510 | 3.0652276 | M040416 | Skin Cancer | Skin | Melanoma |  | |
| ACH-002511 | 1.9221978 | M140325 | Skin Cancer | Skin | Melanoma |  | |
| ACH-002512 | 5.0148016 | MM160113 | Skin Cancer | Skin | Melanoma |  | |
| ACH-002659 | 1.8237494 | JVE127 | Colon/Colorectal Cancer | Colorectal | Colorectal Adenocarcinoma | | |
| ACH-002687 | 3.4918531 | WM3772F | Eye Cancer | Eye | Uveal Melanoma | |  |
| ACH-002800 | 1.7136958 | NCCMPNST2C1 | Sarcoma | Peripheral Nervous System | MPNST |  | |
|  |  |  |  |  |  |  |  |
